# Supplementary material for: Screening for candidate genes related with histological microstructure, meat quality and carcass characteristic in pig based on RNA-seq data
Source: PubMed Central journal article supplement (PMC6127584; doi:10.5713/ajas.17.0714), 2018-03-13
Supplement: ajas-31-10-1565-supplementary.pdf [file ajas-31-10-1565-supplementary.pdf]

Table S1. Selected polymorphisms and corresponding pvalue associated with histological properties.

| SSC | SNP id                 | position  | Histological traits        |                              |                              |                          |                            |                            |
|-----|------------------------|-----------|----------------------------|------------------------------|------------------------------|--------------------------|----------------------------|----------------------------|
|     |                        |           | percentage of I fiber type | percentage of IIA fiber type | percentage of IIB fiber type | diameter of I fiber type | diameter of IIA fiber type | diameter of IIB fiber type |
| 1   | rs3409994 <sup>a</sup> | 305457149 | 0.00335248042790876        | 0.0590634885573476           | 0.00152043845442082          | 0.177017398245816        | 0.183401953136455          | 0.274134039995061          |
| 1   | rs3413903              | 59275519  | 0.00534371626956334        | 0.0328294408373238           | 0.00107310527351659          | 0.112200317611478        | 0.142801551192937          | 0.269173639487387          |
| 1   | rs3218579.             | 14450509  | 0.00556124696577777        | 0.0716640573508268           | 0.00139762500842817          | 0.0163113812279531       | 0.0857576546130285         | 0.137598770338538          |
| 1   | rs3450452 <sup>b</sup> | 264195414 | 0.00590704228054546        | 0.122736337656803            | 0.00269524044107494          | 0.05955947164440999      | 0.132092875050723          | 0.215781647990169          |
| 1   | rs3341760.             | 91996316  | 0.00670337160209689        | 0.337663754061732            | 0.0116286597011556           | 0.173589541989924        | 0.0992024294801522         | 0.293074854373553          |
| 1   | rs3243255 <sup>c</sup> | 306730317 | 0.00790083948040698        | 0.190845910716568            | 0.0107928886355426           | 0.18008675817127         | 0.085014182310868          | 0.311662484472031          |
| 1   | rs8135113.             | 28796261  | 0.00900817676074971        | 0.215527310303848            | 0.0113503377253333           | 0.191655146996718        | 0.0921008401389852         | 0.108837474871834          |
| 1   | rs8134861.             | 16463222  | 0.0123690513707778         | 0.0454347723867294           | 0.00986875514502993          | 0.30408358341069         | 0.0592205829132902         | 0.140336549751768          |
| 1   | rs1072088 <sup>d</sup> | 82059840  | 0.0136373481565458         | 0.18687846063932             | 0.00808365505732643          | 0.0986072808403489       | 0.263900407409718          | 0.473442636802575          |
| 1   | rs3400291.             | 180763523 | 0.0139686660007038         | 0.154075746765721            | 0.0104678955220412           | 0.147652374609822        | 0.0702952249741271         | 0.281726641026217          |
| 1   | rs3403438 <sup>e</sup> | 200362379 | 0.0139686660007038         | 0.154075746765721            | 0.0104678955220412           | 0.147652374609822        | 0.0702952249741269         | 0.281726641026217          |
| 1   | rs3338776.             | 146065178 | 0.0139686660007038         | 0.154075746765722            | 0.0104678955220412           | 0.147652374609823        | 0.0702952249741266         | 0.281726641026216          |
| 1   | rs6972688.             | 3236305   | 0.0141186362400733         | 0.285604962094647            | 0.000549229732830458         | 0.230814352484578        | 0.1543302517026            | 0.41172608602669           |
| 1   | rs7139829.             | 283266342 | 0.014437348492521          | 0.180851913226087            | 0.00682966615989721          | 0.11055400810467         | 0.172023172204587          | 0.224124035675177          |
| 1   | rs3231310              | 215796655 | 0.0153118711904875         | 0.235654131160917            | 0.00727366690542296          | 0.203980306654125        | 0.911772500828247          | 0.384673601416743          |
| 1   | rs3331455              | 87145893  | 0.0163966731579355         | 0.0663658416352514           | 0.00269341649348695          | 0.0440998424838027       | 0.061241805338725          | 0.12457786507978           |
| 1   | rs3218657 <sup>f</sup> | 126385263 | 0.0171387467852789         | 0.208716703553595            | 0.00512186716322155          | 0.103773536020519        | 0.0997602690099982         | 0.229193942602028          |
| 1   | rs8086827 <sup>g</sup> | 201974454 | 0.0227843188613178         | 0.160941933205903            | 0.00701489333611939          | 0.302775027330461        | 0.36494371327024           | 0.706378819763557          |
| 1   | rs3398274 <sup>h</sup> | 86046817  | 0.0234425696891336         | 0.281783036966105            | 0.00878042397437894          | 0.00689351779760885      | 0.0539603952318186         | 0.153313709093762          |
| 1   | rs1072088 <sup>i</sup> | 82059783  | 0.023544647094557          | 0.0287404758798913           | 0.000540984266270709         | 0.356153148478527        | 0.531498917636717          | 0.713093087970178          |
| 1   | rs3189881 <sup>j</sup> | 142983928 | 0.023603626223908          | 0.0513125921509423           | 0.00936952617433432          | 0.0452756769836591       | 0.0743213628565946         | 0.0834607284387265         |
| 1   | rs8097402 <sup>k</sup> | 64129801  | 0.0242176093148346         | 0.126573728595235            | 0.0106152699635386           | 0.110447517769429        | 0.0566863687318889         | 0.278534406804127          |
| 1   | rs8135231.             | 294017568 | 0.0242239609799528         | 0.0947911219857082           | 0.00892462528786562          | 0.15574621642309         | 0.102829850735413          | 0.358968696143399          |
| 1   | rs3185702 <sup>l</sup> | 306985788 | 0.0263425218560985         | 0.192187132755502            | 0.0113780484165758           | 0.196974050636615        | 0.138806385967855          | 0.204247459205859          |
| 1   | rs3451284 <sup>m</sup> | 267559187 | 0.027775700633076          | 0.124844269428571            | 0.0080949583319271           | 0.101937464120971        | 0.154801303909541          | 0.228780567722854          |
| 1   | rs3436942 <sup>n</sup> | 304422050 | 0.0295902906644405         | 0.1082009641437              | 0.00357230990764319          | 0.118357461495387        | 0.0670267087556335         | 0.157134067439611          |
| 1   | rs3274379.             | 86038450  | 0.0296363117896679         | 0.029310657436627            | 0.00913846492832062          | 0.120020838288653        | 0.190511143675014          | 0.279701054417822          |
| 1   | rs3442755 <sup>o</sup> | 144958551 | 0.0304306528187477         | 0.307747071661373            | 0.00576424265962728          | 0.150206986783962        | 0.128449661622279          | 0.314097440089236          |
| 1   | rs3456667 <sup>p</sup> | 84368788  | 0.0305511572115682         | 0.242730351449853            | 0.00616479787691409          | 0.102475187255201        | 0.126630418070983          | 0.309569531611924          |
| 1   | rs3256811.             | 305270382 | 0.0316940248989867         | 0.0653223920694986           | 0.00834048867970987          | 0.0857496453212151       | 0.213182783763782          | 0.24921941635342           |
| 1   | rs3433903.             | 37327570  | 0.0325681726215984         | 0.324074111970198            | 0.00401317868352987          | 0.383143460227735        | 0.426380778618272          | 0.629281520203006          |
| 1   | rs3211598.             | 283051952 | 0.0336207539793486         | 0.0538441291662035           | 0.00207430673889234          | 0.115239688699538        | 0.0863809885715403         | 0.417579331816943          |
| 1   | rs3255664 <sup>q</sup> | 141721981 | 0.0345298456671876         | 0.192987690343411            | 0.0118011627940432           | 0.0547553095693234       | 0.0521821717632775         | 0.0904884140453482         |
| 1   | rs3317176.             | 143930360 | 0.0350647768171321         | 0.0498994487401938           | 0.00713825151606574          | 0.150593934833108        | 0.253947888666732          | 0.356098301047794          |
| 1   | rs3456746.             | 248827966 | 0.0358917632856172         | 0.0463345238391749           | 0.00639889060731786          | 0.12823364614229         | 0.179585988535555          | 0.281475102265858          |
| 1   | rs3256284 <sup>r</sup> | 50175777  | 0.0375779243975934         | 0.0351822338824981           | 0.00340490323860668          | 0.161205111071998        | 0.20944981890252           | 0.360492213288616          |
| 1   | rs3260460 <sup>s</sup> | 307476242 | 0.0395656093097751         | 0.283824348684009            | 0.00976273767078435          | 0.136276086642544        | 0.171135384305977          | 0.32283546035247           |
| 1   | rs3252205              | 10907361  | 0.0401804745345199         | 0.0458895407665772           | 0.00510057381261988          | 0.128075760966858        | 0.190905623053819          | 0.280324635910453          |
| 1   | rs3453876 <sup>t</sup> | 18591467  | 0.0411509968297415         | 0.0874495990068728           | 0.0076116574198672           | 0.136200864962756        | 0.135606973745208          | 0.276971262970254          |
| 1   | rs3231002 <sup>u</sup> | 83410803  | 0.0420367454474066         | 0.0569350072407941           | 0.00134853161814629          | 0.0737279887192004       | 0.210359129238667          | 0.343423792435016          |
| 1   | rs3239221.             | 208238129 | 0.0423439049166626         | 0.0305292216582322           | 0.0051972576494507           | 0.100547004233657        | 0.158159406943658          | 0.241950145925271          |
| 1   | rs3415133.             | 74422533  | 0.0423439049166626         | 0.0305292216582322           | 0.0051972576494507           | 0.100547004233657        | 0.158159406943658          | 0.241950145925271          |
| 1   | rs3324891 <sup>v</sup> | 132678722 | 0.0458445550070332         | 0.444300498692909            | 0.0064276691844358           | 0.202546642720584        | 0.165108000897881          | 0.241749135731994          |

|   |            |           |                      |                     |                      |                    |                     |                    |
|---|------------|-----------|----------------------|---------------------|----------------------|--------------------|---------------------|--------------------|
| 1 | rs3229582i | 126384135 | 0.050195196130505    | 0.364985919700094   | 0.0097606077252325   | 0.192612164191449  | 0.0707595221855232  | 0.317887858228313  |
| 1 | rs3371340i | 33358974  | 0.0525360153682245   | 0.0477224018521101  | 0.00707061102703598  | 0.126310137901548  | 0.197482880148354   | 0.268897621720468  |
| 1 | rs3343673  | 284184921 | 0.0525481495687543   | 0.036870868386024   | 0.00648164564267231  | 0.0339360476967438 | 0.136947444722901   | 0.132290705859013  |
| 1 | rs3318624i | 311559345 | 0.0532857838341765   | 0.187071772804572   | 0.00608690476651739  | 0.207159200538886  | 0.11510622956422    | 0.1825857043477    |
| 1 | rs3228934i | 298943465 | 0.0570911059344998   | 0.0733127242002763  | 0.00074259455806941  | 0.324092046223651  | 0.283899613410231   | 0.389410144651597  |
| 1 | rs3233694i | 50175211  | 0.0588179533518426   | 0.00869512614128417 | 0.00943752566980732  | 0.111887056861693  | 0.189169393640826   | 0.281019139187999  |
| 1 | rs3221211i | 280510302 | 0.05967061866628109  | 0.0595285903192677  | 0.00370041132753074  | 0.0904152907544914 | 0.00642954864873064 | 0.0658286505881013 |
| 1 | rs8087483i | 283609728 | 0.0597208563833915   | 0.0733059398999409  | 0.00604941757489226  | 0.122378501925278  | 0.125567246952733   | 0.437324548804881  |
| 1 | rs8089874i | 283610145 | 0.0597208563833915   | 0.0733059398999409  | 0.00604941757489226  | 0.122378501925278  | 0.125567246952733   | 0.437324548804881  |
| 1 | rs3386789i | 103504169 | 0.0668386469747465   | 0.0757715303270151  | 0.00708367881138721  | 0.132400086443693  | 0.0585641748203113  | 0.48590236069646   |
| 1 | rs3269321i | 302299142 | 0.0774744747787648   | 0.0377397121946279  | 0.0048814035371879   | 0.15114604014676   | 0.226149445379375   | 0.251174784182435  |
| 1 | rs3332553i | 313878617 | 0.0785213558143476   | 0.0579412657042113  | 0.0106625309826887   | 0.162670897316064  | 0.256735177556632   | 0.316891008464154  |
| 1 | rs3249652i | 271655971 | 0.0785213558143476   | 0.0579412657042113  | 0.0106625309826888   | 0.162670897316064  | 0.256735177556632   | 0.316891008464154  |
| 1 | rs3251776i | 303946538 | 0.0833572426286648   | 0.0646261554176018  | 0.00833087608991776  | 0.106619574340334  | 0.105707163296285   | 0.31396721198138   |
| 1 | rs3409745i | 118997548 | 0.0840728539617639   | 0.419045590384662   | 0.0105354748516387   | 0.330275113979485  | 0.039215397572251   | 0.490275852005972  |
| 1 | rs7938770i | 157879748 | 0.0859243436465148   | 0.0286945674215644  | 0.00716162588888384  | 0.0397826208708378 | 0.0488587523799102  | 0.180391741995843  |
| 1 | rs3190361i | 245582084 | 0.0859698013950741   | 0.219044170588514   | 0.00930378561843529  | 0.0376423463673231 | 0.106838362434827   | 0.203516709541196  |
| 1 | rs7933040i | 91872944  | 0.0979735073202697   | 0.12606293028056    | 0.00295813504173352  | 0.231777748493965  | 0.0458747866637897  | 0.128166146665249  |
| 1 | rs8083207i | 252997864 | 0.124196799809035    | 0.51868744117301    | 0.0107596382028973   | 0.103261581762071  | 0.278524984680196   | 0.243424619930044  |
| 1 | rs3289319i | 123368603 | 0.151616239895891    | 0.20057407206482    | 0.00684861868159911  | 0.642690128127468  | 0.489760331727337   | 0.413207014740279  |
| 1 | rs3230006i | 39462786  | 0.161663273915889    | 0.248802248744993   | 0.000659022237053444 | 0.41216016070897   | 0.0432419954153656  | 0.127242580625542  |
| 1 | rs7033636i | 14442593  | 0.16996831549622     | 0.0675621415595887  | 0.00468831389526478  | 0.286677915199037  | 0.214961795436148   | 0.537068711174211  |
| 1 | rs6904529i | 292357382 | 0.215804987656697    | 0.358337991976188   | 0.00827010104802004  | 0.456170869147153  | 0.283882973843368   | 0.303582616171078  |
| 1 | rs8135299i | 305503624 | 0.720496761339335    | 0.653976865607154   | 0.0107697445655904   | 0.395296551122662  | 0.306102995848485   | 0.0643157350936329 |
| 2 | rs3241619i | 10488771  | 0.000462648219101227 | 0.199455384163147   | 0.00449563664759079  | 0.324844423401514  | 0.467212947974308   | 0.551780447178     |
| 2 | rs3340601i | 78832617  | 0.00119700607701089  | 0.117647303855513   | 0.00143132146578057  | 0.228127948082776  | 0.291502194412751   | 0.374676949083733  |
| 2 | rs3189424i | 13408594  | 0.00120645409859502  | 0.227526891524948   | 0.0113671813104878   | 0.0631558275119207 | 0.0671548217606542  | 0.1372782438211    |
| 2 | rs7090508i | 149740319 | 0.00128174968787085  | 0.0211177868630719  | 0.000499751485240913 | 0.0969906042298176 | 0.0912879183133848  | 0.231476502114981  |
| 2 | rs3390362i | 104919154 | 0.00207368479333776  | 0.0122338518728085  | 0.00156445174978068  | 0.367980032803344  | 0.361966233161177   | 0.434475401853545  |
| 2 | rs3457654i | 159561482 | 0.00207368479333777  | 0.0122338518728086  | 0.00156445174978071  | 0.367980032803344  | 0.361966233161178   | 0.434475401853544  |
| 2 | rs3251740i | 107114719 | 0.00390142684199296  | 0.164258758021778   | 0.00209357311758126  | 0.0147904745189411 | 0.137682494779063   | 0.0542337065413342 |
| 2 | rs3429505i | 107363650 | 0.00390142684199296  | 0.164258758021778   | 0.00209357311758126  | 0.0147904745189411 | 0.137682494779063   | 0.0542337065413342 |
| 2 | rs1969497i | 120042893 | 0.00463725341781436  | 0.165240419096315   | 0.00762708421314868  | 0.0890074204669223 | 0.0422930600404913  | 0.149395452729857  |
| 2 | rs3338220i | 149015    | 0.00493183298638927  | 0.0130518521873758  | 0.000266701206576119 | 0.112156701566722  | 0.105374011624018   | 0.218902298256173  |
| 2 | rs3351743i | 127982591 | 0.00549908588795064  | 0.0223136108469875  | 0.0038806278263861   | 0.141801227127494  | 0.213224941993757   | 0.292032873199954  |
| 2 | rs8121843i | 28481463  | 0.00726369716801976  | 0.0533117240319091  | 0.000316020169650435 | 0.135115261816779  | 0.104570561208607   | 0.268966200316102  |
| 2 | rs3350716i | 145962340 | 0.00736070926762321  | 0.220954238655141   | 0.00357298928534615  | 0.151548240062725  | 0.129974733679853   | 0.276740237019097  |
| 2 | rs3217353i | 149745241 | 0.00761990357185629  | 0.249877150151785   | 0.0109131446453263   | 0.0583995913694207 | 0.0107227859817902  | 0.0634927563101771 |
| 2 | rs7029582i | 66682742  | 0.00935322307459372  | 0.136129762522743   | 0.00567153823162922  | 0.330313856536424  | 0.242904846274216   | 0.218051678538774  |
| 2 | rs3364764i | 28482170  | 0.00992727580016529  | 0.0385927531949261  | 0.00109233751586767  | 0.171158782785315  | 0.119132933766505   | 0.317012444647259  |
| 2 | rs3237031i | 12882190  | 0.0107683503441062   | 0.143420738642906   | 0.00370861356408462  | 0.0842037575574427 | 0.0294463829822967  | 0.226193239832709  |
| 2 | rs3274591i | 12882978  | 0.0107683503441062   | 0.143420738642906   | 0.00370861356408462  | 0.0842037575574427 | 0.0294463829822967  | 0.226193239832709  |
| 2 | rs3351036i | 12882908  | 0.0107683503441062   | 0.143420738642906   | 0.00370861356408462  | 0.0842037575574427 | 0.0294463829822967  | 0.226193239832709  |
| 2 | rs3280597i | 61021987  | 0.0123203623003067   | 0.154658063582556   | 0.00293086295240171  | 0.184415471768388  | 0.088081445348883   | 0.323405708109651  |
| 2 | rs3415947i | 6275375   | 0.013484757094475    | 0.397417146754799   | 0.00462710657408809  | 0.296177562031267  | 0.159191167018881   | 0.393665677977919  |
| 2 | rs3251804i | 138701382 | 0.0139686660007038   | 0.154075746765721   | 0.0104678955220412   | 0.147652374609822  | 0.0702952249741269  | 0.281726641026217  |

|             |           |                    |                     |                      |                     |                    |                     |
|-------------|-----------|--------------------|---------------------|----------------------|---------------------|--------------------|---------------------|
| 2 rs3352991 | 4408188   | 0.0143288807269363 | 0.0932682163431512  | 0.000305126909839114 | 0.205593216353807   | 0.157131701537014  | 0.345149642320848   |
| 2 rs3209660 | 71775465  | 0.0143288807269364 | 0.0932682163431511  | 0.000305126909839114 | 0.205593216353807   | 0.157131701537014  | 0.345149642320847   |
| 2 rs3328671 | 153885049 | 0.0144179004913015 | 0.0952823563640165  | 0.00970676118800461  | 0.307172065295611   | 0.172651357910909  | 0.23850245773004    |
| 2 rs6999781 | 16548168  | 0.0164250602488031 | 0.183363185640186   | 0.00542203777196014  | 0.0831940186550725  | 0.0312256923561628 | 0.110893873746819   |
| 2 rs3345586 | 52014704  | 0.0171621282917609 | 0.0682461588525993  | 0.00825343521196662  | 0.209146299289763   | 0.0993760987224283 | 0.334851551086571   |
| 2 rs3391921 | 10168053  | 0.0179710510859965 | 0.287311289628177   | 0.0101785391933175   | 0.14083754759941    | 0.144152234150619  | 0.371022331868033   |
| 2 rs3432070 | 157282686 | 0.0181275653568287 | 0.15330033443133    | 0.0108620762536782   | 0.0765935172937554  | 0.0626451835742366 | 0.11619655915549    |
| 2 rs3388240 | 65401456  | 0.0182415018496304 | 0.182854577314135   | 0.000778787749655973 | 0.230765025792444   | 0.311667841695452  | 0.439422513582524   |
| 2 rs3217509 | 12131461  | 0.0207147127269841 | 0.398978242852886   | 0.00392204791223662  | 0.0897934544956558  | 0.107375553200132  | 0.251862462317142   |
| 2 rs7015205 | 52047674  | 0.0217934268583884 | 0.0389858509572832  | 0.00126134160680166  | 0.0670018728535395  | 0.0999641599680247 | 0.260145379753215   |
| 2 rs6938676 | 6953607   | 0.021824969003032  | 0.0621528830068201  | 0.00160652676816406  | 0.294120831231042   | 0.219153466125978  | 0.574270088055224   |
| 2 rs5561828 | 147318843 | 0.0218282397265991 | 0.0584785877254089  | 0.00269169452604559  | 0.1214705892454747  | 0.151749555570811  | 0.312120628515062   |
| 2 rs3439390 | 149746681 | 0.0218419699488899 | 0.0233927761628423  | 0.00157946256163068  | 0.0142912698749525  | 0.0496171442393462 | 0.139775188004665   |
| 2 rs3386414 | 9241201   | 0.0226516027076687 | 0.327161021128783   | 0.0321811177757073   | 0.00193347240209044 | 0.0250535311795251 | 0.00515697209139389 |
| 2 rs3387175 | 9192543   | 0.0226516027076687 | 0.327161021128783   | 0.0321811177757073   | 0.00193347240209044 | 0.0250535311795251 | 0.00515697209139389 |
| 2 rs3447398 | 9186577   | 0.0226516027076687 | 0.327161021128783   | 0.0321811177757073   | 0.00193347240209044 | 0.0250535311795251 | 0.00515697209139389 |
| 2 rs3443972 | 148327971 | 0.0234073476589881 | 0.210599061443396   | 0.0114838435421427   | 0.0133768875083331  | 0.042507229235867  | 0.0328513719429441  |
| 2 rs6917516 | 8328525   | 0.0262496250638064 | 0.0152879585799422  | 0.00518632132210136  | 0.0817029100852417  | 0.174657862939988  | 0.199870049127405   |
| 2 rs3410488 | 142608506 | 0.0281369354327813 | 0.0334822001252552  | 0.00273459287178072  | 0.0800759446173637  | 0.148143367879294  | 0.207424198517441   |
| 2 rs3217195 | 124611830 | 0.0289313219262311 | 0.130962159927636   | 0.01027520298749568  | 0.159505215414417   | 0.021322271230145  | 0.197522391856187   |
| 2 rs6985894 | 29200173  | 0.0289313219262311 | 0.130962159927636   | 0.00127520298749569  | 0.159505215414417   | 0.021322271230145  | 0.197522391856188   |
| 2 rs3431655 | 10465972  | 0.0294853919371986 | 0.0951640149960953  | 0.00684799268168592  | 0.0230384413702044  | 0.0534956523733169 | 0.073291756860693   |
| 2 rs3396116 | 142687520 | 0.0305511572115682 | 0.242730351449853   | 0.00616479787691406  | 0.102475187255201   | 0.126630418070983  | 0.309569531611924   |
| 2 rs7109082 | 142695696 | 0.0305511572115682 | 0.242730351449853   | 0.00616479787691406  | 0.102475187255201   | 0.126630418070983  | 0.309569531611924   |
| 2 rs3189581 | 78770722  | 0.0314625092077963 | 0.131275741085077   | 0.00106351832324044  | 0.159083420473214   | 0.0343811937831793 | 0.218371764010871   |
| 2 rs3268539 | 77487748  | 0.0326180406184519 | 0.157514967738923   | 0.00216605217249106  | 0.365444425598378   | 0.172292885179581  | 0.288825545298244   |
| 2 rs3244852 | 9708248   | 0.0372637235255608 | 0.100677042441695   | 0.0119163898944046   | 0.145830282578876   | 0.133404117163134  | 0.353019004199879   |
| 2 rs3312294 | 4407977   | 0.0380467913740284 | 0.0833527010947869  | 0.00833192062019866  | 0.0203370645268698  | 0.023015855778295  | 0.135496762142888   |
| 2 rs3386842 | 4408809   | 0.0382848811473437 | 0.0835073800066817  | 0.00700649628919335  | 0.644909526378105   | 0.299808222279776  | 0.51008550160904    |
| 2 rs3336493 | 107044297 | 0.0382920116747383 | 0.0373071472448573  | 0.00679942521640986  | 0.139760779454025   | 0.212804236077529  | 0.261366211104462   |
| 2 rs3346772 | 5956633   | 0.0384072702066742 | 0.0121759670438374  | 0.00902763629746269  | 0.459292669797264   | 0.304308522050447  | 0.281744385446702   |
| 2 rs3331849 | 107117522 | 0.0384760925932951 | 0.0220822635747315  | 0.00477917461353888  | 0.0807544899571381  | 0.132401976508004  | 0.215287949203692   |
| 2 rs3463734 | 6195341   | 0.0386265973385001 | 0.0781205842191404  | 0.0113080116428823   | 0.219363350917563   | 0.266045186209608  | 0.404389711512285   |
| 2 rs3414813 | 52047699  | 0.0415275029900339 | 0.0828737225335657  | 0.00294446189011145  | 0.167081558780254   | 0.117105884408945  | 0.157727008690581   |
| 2 rs3412916 | 143453247 | 0.0423439049166624 | 0.0305292216582321  | 0.00519725764945061  | 0.100547004233656   | 0.158159406943658  | 0.241950145925271   |
| 2 rs3340578 | 145910999 | 0.0423439049166626 | 0.0305292216582322  | 0.0051972576494507   | 0.100547004233657   | 0.158159406943658  | 0.241950145925271   |
| 2 rs3398032 | 28860909  | 0.0423439049166626 | 0.0305292216582322  | 0.0051972576494507   | 0.100547004233657   | 0.158159406943658  | 0.241950145925271   |
| 2 rs3325427 | 71229194  | 0.0426411683785499 | 0.0633150541018699  | 0.00162544293906005  | 0.26485561142337    | 0.200932386721513  | 0.372918224628575   |
| 2 rs3437633 | 6951070   | 0.0451602495286489 | 0.0399754426967507  | 0.00544551342739346  | 0.0932240023633573  | 0.118833011904445  | 0.106503328331676   |
| 2 rs8121161 | 8506433   | 0.0473942037999439 | 0.04776599446793    | 0.0107444616435149   | 0.0775218054275007  | 0.264758222779848  | 0.19454930990093    |
| 2 rs1969527 | 8651058   | 0.0492595268788747 | 0.0398455970608279  | 0.0100996321963378   | 0.0621814169428306  | 0.224434409443027  | 0.217081696648      |
| 2 rs3222632 | 8504973   | 0.0492595268788747 | 0.0398455970608279  | 0.0100996321963378   | 0.0621814169428306  | 0.224434409443027  | 0.217081696648      |
| 2 rs8147459 | 8487074   | 0.0492595268788747 | 0.0398455970608279  | 0.0100996321963378   | 0.0621814169428306  | 0.224434409443027  | 0.217081696648      |
| 2 rs3296056 | 113213153 | 0.0501951961305051 | 0.364985919700095   | 0.00976060772523268  | 0.19261216419145    | 0.0707595221855238 | 0.317887858228313   |
| 2 rs3417196 | 8424293   | 0.0515414110517716 | 0.00679035956784541 | 0.00544681527726169  | 0.0764288254928222  | 0.142083736334713  | 0.183931378679462   |
| 2 rs3365616 | 6067175   | 0.0517812591306841 | 0.0362469728502878  | 0.00617611814582923  | 0.0605677111501313  | 0.135237840689656  | 0.21450442281838    |

|             |           |                      |                    |                     |                     |                     |                      |
|-------------|-----------|----------------------|--------------------|---------------------|---------------------|---------------------|----------------------|
| 2 rs3290302 | 35436874  | 0.0524309240888777   | 0.0503242636359191 | 0.0101861894214942  | 0.17317471537095    | 0.178783987316287   | 0.324667788362163    |
| 2 rs3397677 | 119309425 | 0.0534481716839419   | 0.0454183090182426 | 0.00856649566678947 | 0.039393553551672   | 0.0439080215768211  | 0.0567214287547952   |
| 2 rs5561834 | 8470325   | 0.0550895927839252   | 0.0666873072620573 | 0.00794857885055594 | 0.113192728743922   | 0.337127334297278   | 0.209291485886864    |
| 2 rs8079445 | 140848191 | 0.0550960476076539   | 0.23002736144074   | 0.00154640201383483 | 0.462301434449887   | 0.232543610131101   | 0.368609311901224    |
| 2 rs3201139 | 53230161  | 0.0562729636468378   | 0.0756363682699701 | 0.0045066364385162  | 0.134358271657295   | 0.232928215621346   | 0.37498333902532     |
| 2 rs7109676 | 130861729 | 0.0584205875485014   | 0.412843096504391  | 0.00880408719888948 | 0.396282496777121   | 0.512662781020421   | 0.655831414256239    |
| 2 rs3339867 | 87188580  | 0.0594214821023431   | 0.0824052819487678 | 0.0118326528807308  | 0.0846258629206858  | 0.0610598458320248  | 0.18756632208939     |
| 2 rs3376297 | 139885560 | 0.0611454158526504   | 0.545956874221555  | 0.00349353150320965 | 0.465478001339993   | 0.323410497959009   | 0.440945376495234    |
| 2 rs3291678 | 61010117  | 0.0628669110452344   | 0.189388322598304  | 0.00500618038617328 | 0.20288652858415    | 0.0501355125306912  | 0.24280184071525     |
| 2 rs6939734 | 11385202  | 0.0628674833716746   | 0.0440284619396895 | 0.0101879084875249  | 0.125804094421686   | 0.130163966005462   | 0.277722593993328    |
| 2 rs3190231 | 58274288  | 0.0647443308641154   | 0.0494686596468204 | 0.0092809039242996  | 0.13679067418444    | 0.205503977530458   | 0.218938635331755    |
| 2 rs3355247 | 53071367  | 0.0648497350184825   | 0.0171030748708011 | 0.00792568446382544 | 0.0276794812794575  | 0.0305879997157308  | 0.0188878895057861   |
| 2 rs3300287 | 59589437  | 0.0657057413977188   | 0.212171540762784  | 0.00620682400106233 | 0.328357233944682   | 0.140893850686664   | 0.297412085533483    |
| 2 rs3313590 | 66667239  | 0.0699667573727654   | 0.421336689736299  | 0.00724208619450727 | 0.502866434677235   | 0.409694103579187   | 0.440426481319658    |
| 2 rs3192683 | 3550497   | 0.0785213558143473   | 0.0579412657042112 | 0.0106625309826886  | 0.162670897316063   | 0.256735177556632   | 0.316891008464154    |
| 2 rs3447265 | 29777832  | 0.0785213558143476   | 0.0579412657042113 | 0.0106625309826888  | 0.162670897316064   | 0.256735177556632   | 0.316891008464154    |
| 2 rs3185430 | 20011284  | 0.0805955421599937   | 0.107584782401038  | 0.00269255759420773 | 0.462767666966502   | 0.218157734288488   | 0.308915992126848    |
| 2 rs3451228 | 3550403   | 0.0832306527878684   | 0.134583554927299  | 0.00801267907901458 | 0.195587189812758   | 0.384941128182372   | 0.489536691137887    |
| 2 rs6911636 | 45085058  | 0.083957244484633    | 0.0028150498950162 | 0.00866652365118706 | 0.140628911714106   | 0.17388630933522    | 0.34472674310591     |
| 2 rs8121148 | 69295074  | 0.0895334977145609   | 0.59516084298682   | 0.0109132146968932  | 0.55198869782312    | 0.491027011773069   | 0.538026940570021    |
| 2 rs3191380 | 162099305 | 0.0901687919590346   | 0.251421280930626  | 0.0102539846920453  | 0.50261413964314    | 0.770202799500638   | 0.639603329033219    |
| 2 rs8121058 | 107456589 | 0.102662545103457    | 0.173064917442623  | 0.0686196716720211  | 0.00878346171417062 | 0.0224794317398296  | 0.00148242973449847  |
| 2 rs8136866 | 3598295   | 0.10916022758873     | 0.303173150617141  | 0.00521334629581156 | 0.429284665409667   | 0.0868216901183497  | 0.374659374659828    |
| 2 rs3284039 | 17968731  | 0.147620932193932    | 0.191857326414915  | 0.112103801085181   | 0.00866751755144251 | 0.00522298520184458 | 0.188215672404615    |
| 2 rs3425178 | 124629256 | 0.150612046651529    | 0.389023689770039  | 0.00797890436198457 | 0.440869125974598   | 0.0963379172010502  | 0.387153599001683    |
| 2 rs3292546 | 3762082   | 0.165382845252365    | 0.201042676343557  | 0.00759811390342476 | 0.672541367831573   | 0.367164922121742   | 0.469907733787108    |
| 2 rs3224270 | 10366300  | 0.200139689758372    | 0.279636934846583  | 0.00590842643747648 | 0.0325903601418099  | 0.758147337347863   | 0.207118612347629    |
| 2 rs3304077 | 149476133 | 0.200840225665928    | 0.172497893483474  | 0.00246714788546428 | 0.286029447250287   | 0.0135503364310059  | 0.664941979398839    |
| 2 rs3221993 | 2976878   | 0.274350033011803    | 0.300452909281252  | 0.00976205966356203 | 0.515353301364507   | 0.163823932966833   | 0.285634627456071    |
| 2 rs3306990 | 6232852   | 0.654432842448559    | 0.681123097136882  | 0.0103272111698876  | 0.21378170479874    | 0.405781752569283   | 0.49891891733606     |
| 3 rs3186073 | 140442770 | 0.00046264821910122  | 0.199455384163147  | 0.0044956366475908  | 0.324844423401514   | 0.467212947974308   | 0.551780447177999    |
| 3 rs3219120 | 51093471  | 0.000910600326432547 | 0.161901170869873  | 0.00704624892532969 | 0.0584036018699144  | 0.0762101214884107  | 0.16500846906939     |
| 3 rs3275635 | 75479003  | 0.00119700607701089  | 0.117647303855513  | 0.00143132146578057 | 0.228127948082776   | 0.291502194412751   | 0.374676949083734    |
| 3 rs3231662 | 110256290 | 0.00144925140938012  | 0.102591774219096  | 0.00109909390466691 | 0.20674478988452    | 0.226104851853815   | 0.215016188310896    |
| 3 rs3228780 | 54729760  | 0.00200461231495734  | 0.371318989758905  | 0.0110524162516829  | 0.0961968048617315  | 0.0462061490135286  | 0.170049840565589    |
| 3 rs1969587 | 49102108  | 0.00307079881651106  | 0.120663527745057  | 0.00322583010776098 | 0.0456052565081967  | 0.0515562746935478  | 0.153798117259959    |
| 3 rs3274045 | 34791369  | 0.00341196320017829  | 0.0592912289754704 | 0.00011008566082961 | 0.108330784120271   | 0.0952103934950349  | 0.228573968657928    |
| 3 rs3363882 | 9677526   | 0.00397319232534075  | 0.282103084614935  | 0.00893342421572834 | 0.452112550859205   | 0.611786989741745   | 0.706881550413126    |
| 3 rs3404732 | 16506568  | 0.00419053070755259  | 0.161787403866869  | 0.00389708924907921 | 0.00209905233446641 | 0.0351095481069384  | 0.124653574027981    |
| 3 rs3198722 | 133660770 | 0.00474388694294693  | 0.0630985729639914 | 0.00293464972964985 | 0.0942147061899654  | 0.0586541193308847  | 0.081536475608021    |
| 3 rs8121670 | 1168795   | 0.00530542760614258  | 0.561112171159166  | 0.0288799175585758  | 0.00147723833166294 | 0.0177828731356993  | 0.000446447210354452 |
| 3 rs3238849 | 90197413  | 0.00542146633516039  | 0.0638383655965715 | 0.00643176037640885 | 0.106115472442242   | 0.251546477560871   | 0.163597114674162    |
| 3 rs3430982 | 55033458  | 0.00744791644077417  | 0.109978672291311  | 0.00433338952364343 | 0.105689919658096   | 0.0339179715519011  | 0.249517490586401    |
| 3 rs3380475 | 45572627  | 0.0100838099699188   | 0.12625687260319   | 0.00166737068149995 | 0.250922884379747   | 0.196969669426996   | 0.476911914922483    |
| 3 rs8132007 | 9679148   | 0.0118082024071809   | 0.318198187421851  | 0.00545654365467187 | 0.212449213194588   | 0.0794176187422209  | 0.361995764851021    |
| 3 rs3319777 | 18750377  | 0.0126832809832882   | 0.233723385175048  | 0.00384588185389461 | 0.0724097045136388  | 0.259275777961203   | 0.275165223341059    |

|              |           |                    |                     |                      |                     |                     |                     |
|--------------|-----------|--------------------|---------------------|----------------------|---------------------|---------------------|---------------------|
| 3 rs3352361: | 77094749  | 0.0139686660007038 | 0.154075746765721   | 0.0104678955220412   | 0.147652374609822   | 0.0702952249741271  | 0.281726641026217   |
| 3 rs3197874: | 134082934 | 0.0143288807269363 | 0.0932682163431514  | 0.000305126909839116 | 0.205593216353807   | 0.157131701537014   | 0.345149642320847   |
| 3 rs3182642: | 60842243  | 0.0143886103950162 | 0.105977494134964   | 0.00655801079489506  | 0.104090309539945   | 0.0387642546875861  | 0.256860416650655   |
| 3 rs3359765: | 60842150  | 0.0143886103950162 | 0.105977494134964   | 0.00655801079489506  | 0.104090309539945   | 0.0387642546875861  | 0.256860416650655   |
| 3 rs3388802: | 29056946  | 0.0149829152978176 | 0.201047266917818   | 0.00269404743130387  | 0.0735976989245961  | 0.0927475494536353  | 0.221184602955021   |
| 3 rs3279352: | 135774892 | 0.0168843618815276 | 0.0960526749459517  | 0.0108877881393201   | 0.160837011218337   | 0.109602260785092   | 0.133691764790075   |
| 3 rs6999397: | 15665486  | 0.0168843618815276 | 0.0960526749459523  | 0.0108877881393204   | 0.160837011218338   | 0.109602260785092   | 0.133691764790075   |
| 3 rs3400775: | 6693379   | 0.0180247222850767 | 0.186542102230461   | 0.000673011742291235 | 0.0934366986234011  | 0.0960830545759733  | 0.0162406926798774  |
| 3 rs3278666: | 90742878  | 0.0195020992859059 | 0.00185499372391153 | 0.00795688322309873  | 0.296889510273534   | 0.326143540886683   | 0.561186789259704   |
| 3 rs3358828: | 135773744 | 0.0226516027076687 | 0.327161021128783   | 0.0321811177757073   | 0.00193347240209044 | 0.0250535311795251  | 0.00515697209139389 |
| 3 rs3460274: | 135774121 | 0.0281369354327813 | 0.0334822001252552  | 0.00273459287178072  | 0.0800759446173637  | 0.148143367879294   | 0.207424198517441   |
| 3 rs8130750: | 135773910 | 0.0281369354327813 | 0.0334822001252552  | 0.00273459287178072  | 0.0800759446173637  | 0.148143367879294   | 0.207424198517441   |
| 3 rs8133263: | 135773709 | 0.0281369354327813 | 0.0334822001252552  | 0.00273459287178072  | 0.0800759446173637  | 0.148143367879294   | 0.207424198517441   |
| 3 rs1969530: | 140442528 | 0.0289313219262311 | 0.130962159927636   | 0.00127520298749568  | 0.159505215414417   | 0.021322271230145   | 0.197522391856188   |
| 3 rs3188382: | 10945743  | 0.0305470631950596 | 0.133741599714065   | 0.00105405795739599  | 0.248602568957393   | 0.213936570225771   | 0.40524398661801    |
| 3 rs3251866: | 18071970  | 0.0341511616373727 | 0.105862269815812   | 0.00412310986642569  | 0.146349892160458   | 0.0776329790418706  | 0.129503242744366   |
| 3 rs3190536: | 120015719 | 0.0379832716336365 | 0.434533612714525   | 0.0107145194155869   | 0.14851030991038    | 0.115841835333656   | 0.0921175033992631  |
| 3 rs3317750: | 42010131  | 0.0390177402672877 | 0.104980344124688   | 0.0108129306880077   | 0.263777358902504   | 0.13147992132442    | 0.0562655182394795  |
| 3 rs3250734: | 118698604 | 0.039194900939575  | 0.426156391699873   | 0.00528552136665584  | 0.0576508174308147  | 0.281801036424618   | 0.0524100089954583  |
| 3 rs8121670: | 1168711   | 0.039952359208628  | 0.596226078316504   | 0.117131111906752    | 0.00184362792357279 | 0.00592418213831071 | 0.00608414364797501 |
| 3 rs7907951: | 74954256  | 0.0416534069941933 | 0.0115585009907637  | 0.00996243752139376  | 0.1063452075715     | 0.190308189561073   | 0.239554789872991   |
| 3 rs3298707: | 74994469  | 0.0423439049166626 | 0.0305292216582322  | 0.0051972576494507   | 0.100547004233657   | 0.158159406943658   | 0.241950145925271   |
| 3 rs8121511: | 113261912 | 0.0424026660824284 | 0.0473784362224239  | 0.00906070756463973  | 0.139815151637845   | 0.203823254616471   | 0.308681919341283   |
| 3 rs3247218: | 140481977 | 0.0430254144858091 | 0.0269991920171066  | 0.00262017886501389  | 0.0545574289214095  | 0.13333623242895    | 0.225611065712492   |
| 3 rs4543550: | 118991798 | 0.0458445550070332 | 0.444300498692909   | 0.0064276691844358   | 0.202546642720584   | 0.165108000897881   | 0.241749135731994   |
| 3 rs3279439: | 34791856  | 0.0458445550070334 | 0.44430049869291    | 0.00642766918443609  | 0.202546642720586   | 0.165108000897881   | 0.241749135731993   |
| 3 rs3190808: | 119000485 | 0.0497870396805122 | 0.222801865562031   | 0.00098924977550573  | 0.0557154787856614  | 0.083854936005752   | 0.0743074685967857  |
| 3 rs7881609: | 109403689 | 0.0501951961305049 | 0.364985919700094   | 0.00976060772523251  | 0.192612164191449   | 0.0707595221855234  | 0.317887858228314   |
| 3 rs3241238: | 43258106  | 0.0506737416720563 | 0.126376923364705   | 0.0110149750907565   | 0.0644545420209761  | 0.122469637548391   | 0.136906488962946   |
| 3 rs3227311: | 18708289  | 0.0515414110517716 | 0.00679035956784541 | 0.00544681527726169  | 0.0764288254928222  | 0.142083736334713   | 0.183931378679462   |
| 3 rs3268961: | 18086348  | 0.0529956496839178 | 0.0471202334560714  | 0.00866301618310661  | 0.131628444942535   | 0.187724802300558   | 0.2837622946128     |
| 3 rs3339759: | 135774503 | 0.0534570971279046 | 0.0391035547592539  | 0.00681306457546247  | 0.0255616335990216  | 0.0269682904498718  | 0.0230913269082707  |
| 3 rs3265758: | 119068760 | 0.0550960476076542 | 0.230027361440738   | 0.00154640201383481  | 0.462301434449888   | 0.232543610131101   | 0.368609311901224   |
| 3 rs7090787: | 59389077  | 0.05930797907805   | 0.0469513747642268  | 0.0104089509989762   | 0.129452249256911   | 0.198580155365977   | 0.294054174599176   |
| 3 rs3242498: | 16505486  | 0.0726604603598213 | 0.180575102390096   | 0.00411932633961813  | 0.223393908272786   | 0.186534517763461   | 0.402428098989452   |
| 3 rs3312610: | 34802427  | 0.073146626744139  | 0.0216650052146494  | 0.00384677280114326  | 0.201576139823547   | 0.173496590586754   | 0.2904579102751     |
| 3 rs3329517: | 34798653  | 0.073146626744139  | 0.0216650052146494  | 0.00384677280114326  | 0.201576139823547   | 0.173496590586754   | 0.2904579102751     |
| 3 rs8137611: | 119018106 | 0.0785213558143473 | 0.0579412657042112  | 0.0106625309826886   | 0.162670897316063   | 0.256735177556632   | 0.316891008464154   |
| 3 rs3229664: | 71097294  | 0.0924202689735382 | 0.470075291606267   | 0.00767905519111516  | 0.424156216852572   | 0.943995857909854   | 0.603822948419952   |
| 3 rs3218939: | 134081561 | 0.0979735073202689 | 0.12606293028056    | 0.00295813504173328  | 0.231777748493961   | 0.0458747866637891  | 0.128166146665249   |
| 3 rs3336028: | 34802866  | 0.099350586541331  | 0.0533848668666464  | 0.00536327825461869  | 0.242045383210409   | 0.182317433489534   | 0.208386902958117   |
| 3 rs3235395: | 135769426 | 0.104265621980776  | 0.592550083908101   | 0.155508310359486    | 0.00729056764500566 | 0.151544796502458   | 0.00309262632987667 |
| 3 rs8093947: | 103260466 | 0.105531218170771  | 0.264371242979245   | 0.00581690061433073  | 0.629848466584226   | 0.358337278666375   | 0.52944804103637    |
| 3 rs3213470: | 16660535  | 0.111681945657973  | 0.13973952095204    | 0.00394782907598255  | 0.451951921978702   | 0.396250377090039   | 0.52131796918366    |
| 3 rs3361445: | 16660534  | 0.111681945657973  | 0.13973952095204    | 0.00394782907598255  | 0.451951921978702   | 0.396250377090039   | 0.52131796918366    |
| 3 rs3190634: | 10950720  | 0.137733811469992  | 0.314568324305091   | 0.0028327361995034   | 0.285165245228656   | 0.122319048666718   | 0.326556198458623   |

|             |           |                     |                    |                      |                    |                    |                    |
|-------------|-----------|---------------------|--------------------|----------------------|--------------------|--------------------|--------------------|
| 3 rs3196775 | 18829833  | 0.151616239895891   | 0.20057407206482   | 0.00684861868159912  | 0.642690128127469  | 0.489760331727337  | 0.413207014740279  |
| 3 rs3389064 | 6049588   | 0.160672221418397   | 0.0666143558705132 | 0.00886345752788612  | 0.0733957054360968 | 0.0717155995033121 | 0.148988188103018  |
| 3 rs3329678 | 26191047  | 0.165787215909222   | 0.189544258581167  | 0.00394875554151484  | 0.615504248435453  | 0.377498497468585  | 0.415345838094342  |
| 3 rs3286166 | 17095583  | 0.20535564755803    | 0.7271792036719    | 0.00489317895644535  | 0.492492149756878  | 0.99330735831902   | 0.411188781263186  |
| 3 rs8121043 | 74938330  | 0.720496761339334   | 0.653976865607156  | 0.0107697445655916   | 0.395296551122657  | 0.306102995848486  | 0.0643157350936311 |
| 4 rs7043981 | 101913226 | 0.00185037573752588 | 0.169431722799615  | 0.0104567754291609   | 0.302197923909925  | 0.285263619489506  | 0.442374990523819  |
| 4 rs3326261 | 680873    | 0.00474388694294692 | 0.063098572963991  | 0.00293464972964982  | 0.0942147061899648 | 0.0586541193308844 | 0.0815364756080215 |
| 4 rs7138483 | 30228250  | 0.0064167698446831  | 0.0431207492046151 | 0.000106925419913089 | 0.0994977663181993 | 0.0915659767373804 | 0.232573046185213  |
| 4 rs3318567 | 107108170 | 0.00651169416270308 | 0.0597517032114412 | 0.00168416834306367  | 0.216984646052337  | 0.146999836072251  | 0.232580676954975  |
| 4 rs3202086 | 590433    | 0.00703909491964822 | 0.295954912008768  | 0.0109350596227603   | 0.220486650717964  | 0.0978116458160822 | 0.355678402950814  |
| 4 rs3256970 | 511359    | 0.00869545482497085 | 0.098599835923929  | 0.0021104954173449   | 0.171477132125306  | 0.105190823599856  | 0.313228456870385  |
| 4 rs8083720 | 119078761 | 0.0136373481565459  | 0.18687846063932   | 0.0080836550573264   | 0.0986072808403496 | 0.263900407409719  | 0.473442636802576  |
| 4 rs5561876 | 98616034  | 0.0145330460086101  | 0.0330160684477897 | 0.0101704743530925   | 0.446490827382867  | 0.258997244507257  | 0.538577130650196  |
| 4 rs8099121 | 481404    | 0.0156809779714261  | 0.0279205288135905 | 0.000332546012845097 | 0.0706299237739638 | 0.0199524081244673 | 0.287687227583418  |
| 4 rs3314837 | 84149019  | 0.0157592262481804  | 0.0933976954756761 | 0.0012207936366241   | 0.230335872732723  | 0.154980400148096  | 0.398944885246848  |
| 4 rs3364422 | 74655619  | 0.0192068261804972  | 0.221484756575596  | 0.00573502609398542  | 0.232445870834504  | 0.281851198070349  | 0.484505968948166  |
| 4 rs3369413 | 139804716 | 0.0200768178454632  | 0.169638062011956  | 0.00110567405008687  | 0.239622709612157  | 0.266801706097222  | 0.498222357101242  |
| 4 rs3402453 | 45017210  | 0.0281369354327813  | 0.0334822001252552 | 0.00273459287178072  | 0.0800759446173637 | 0.148143367879294  | 0.207424198517441  |
| 4 rs3416302 | 44907392  | 0.0281369354327813  | 0.0334822001252552 | 0.00273459287178072  | 0.0800759446173637 | 0.148143367879294  | 0.207424198517441  |
| 4 rs3232406 | 103449663 | 0.0304306528187477  | 0.307747071661373  | 0.00576424265962728  | 0.150206986783962  | 0.128449661622279  | 0.314097440089236  |
| 4 rs7913484 | 106283730 | 0.0305470631950596  | 0.133741599714066  | 0.001054057957396    | 0.248602568957393  | 0.213936570225771  | 0.40524398661801   |
| 4 rs3207092 | 107344094 | 0.0315633440184208  | 0.0381321413635935 | 0.00171633741255882  | 0.0935416253099771 | 0.0596748615175541 | 0.34657836297629   |
| 4 rs3303724 | 98096357  | 0.0322556909416104  | 0.121037557982462  | 0.00138642299384898  | 0.318313431489564  | 0.252158673483273  | 0.46483749328932   |
| 4 rs3244292 | 36670173  | 0.0384760925932951  | 0.0220822635747315 | 0.00477917461353888  | 0.0807544899571381 | 0.132401976508004  | 0.215287949203692  |
| 4 rs3406087 | 391557    | 0.0392486703378339  | 0.15931515540409   | 0.00909254202208656  | 0.149527292295033  | 0.180339767493718  | 0.561065319602662  |
| 4 rs3226222 | 107636581 | 0.039959943044984   | 0.0529409337583795 | 0.00926473253851777  | 0.154970281748909  | 0.0473119874591453 | 0.317412843156742  |
| 4 rs3383021 | 75048130  | 0.0416534069941933  | 0.0115585009907637 | 0.00996243752139376  | 0.1063452075715    | 0.190308189561073  | 0.239554789872991  |
| 4 rs3349468 | 510528    | 0.0423439049166626  | 0.0305292216582322 | 0.0051972576494507   | 0.100547004233657  | 0.158159406943658  | 0.241950145925271  |
| 4 rs3360408 | 121357939 | 0.0426411683785499  | 0.0633150541018699 | 0.00162544293906005  | 0.26485561142337   | 0.200932386721513  | 0.372918224628576  |
| 4 rs3406143 | 102235878 | 0.0448366262138429  | 0.131294311378583  | 0.0034534035320687   | 0.207687665849202  | 0.222321359649452  | 0.483547057680426  |
| 4 rs3360120 | 88951106  | 0.0456243157049062  | 0.0637406607470033 | 0.00165152582456405  | 0.226638052030032  | 0.209777056437838  | 0.372936108602923  |
| 4 rs8079681 | 90936534  | 0.0515449205686065  | 0.323740175933054  | 0.00234241353694961  | 0.300855522219975  | 0.511566969890236  | 0.608183749473693  |
| 4 rs3378803 | 142197626 | 0.0525360153682245  | 0.0477224018521101 | 0.00707061102703598  | 0.126310137901548  | 0.197482880148354  | 0.268897621720468  |
| 4 rs3252234 | 129797734 | 0.0534481716839419  | 0.0454183090182426 | 0.00856649566678947  | 0.0393935553551672 | 0.0439080215768211 | 0.0567214287547952 |
| 4 rs8090509 | 33354941  | 0.0569174134195436  | 0.387051243787735  | 0.00473019323624648  | 0.0911410276442106 | 0.0544088464382456 | 0.255439878650029  |
| 4 rs3427003 | 98096734  | 0.0585454248887385  | 0.19919522813541   | 0.00460714299254188  | 0.232223826787827  | 0.0477440586975311 | 0.105095503891817  |
| 4 rs3366013 | 109285951 | 0.0593079790780498  | 0.0469513747642266 | 0.0104089509989761   | 0.129452249256911  | 0.198580155365976  | 0.294054174599176  |
| 4 rs3379551 | 109285575 | 0.0593079790780498  | 0.0469513747642266 | 0.0104089509989761   | 0.129452249256911  | 0.198580155365976  | 0.294054174599176  |
| 4 rs3365567 | 102507179 | 0.0648762263138502  | 0.0113827828527588 | 0.0117699928466644   | 0.071475537557346  | 0.0281943130347479 | 0.0638983093126277 |
| 4 rs3424764 | 19543525  | 0.0684723365764723  | 0.0764549560424297 | 0.0101833770983716   | 0.0681995578751471 | 0.0366114006292126 | 0.0695988668198296 |
| 4 rs3459795 | 121552666 | 0.0716343689866714  | 0.0303275635713457 | 0.00857915775919123  | 0.0574440687349199 | 0.0719108088980723 | 0.0789716610896106 |
| 4 rs3297442 | 98299576  | 0.0726237217399503  | 0.0357295031786669 | 0.00775709507102094  | 0.107181364300565  | 0.152524084211946  | 0.300383331864171  |
| 4 rs3397199 | 90392534  | 0.106670630264077   | 0.166644466419103  | 0.00430350129922207  | 0.264049063299551  | 0.312846579240384  | 0.252103609347263  |
| 4 rs3333184 | 119659150 | 0.109499395219967   | 0.13673587449252   | 0.00649672232985041  | 0.256003434170617  | 0.189400539115005  | 0.641049983681394  |
| 4 rs3433266 | 119659648 | 0.109499395219967   | 0.13673587449252   | 0.00649672232985041  | 0.256003434170617  | 0.189400539115005  | 0.641049983681394  |
| 4 rs8087412 | 64744122  | 0.110732390401173   | 0.087259659668136  | 0.0117869005655884   | 0.182258731870145  | 0.226821988088888  | 0.177408614900505  |

|              |           |                      |                    |                      |                     |                     |                    |
|--------------|-----------|----------------------|--------------------|----------------------|---------------------|---------------------|--------------------|
| 4 rs3243176l | 87135831  | 0.200840225665928    | 0.172497893483474  | 0.00246714788546428  | 0.286029447250287   | 0.0135503364310059  | 0.664941979398839  |
| 5 rs3260018l | 42376816  | 0.000403859133365586 | 0.113874807986438  | 0.000482817504230312 | 0.0741716489404834  | 0.145714869229645   | 0.152190821077986  |
| 5 rs3240929  | 60286150  | 0.00207368479333776  | 0.0122338518728084 | 0.00156445174978067  | 0.367980032803343   | 0.361966233161177   | 0.434475401853545  |
| 5 rs8099291l | 12297489  | 0.00216964577322513  | 0.144706093647982  | 0.00434546302224354  | 0.00781967798080896 | 0.0488081709568648  | 0.0896759781893515 |
| 5 rs3415793l | 66282626  | 0.00223648330526575  | 0.174899444133457  | 0.00719444183487195  | 0.195584872828624   | 0.155416711784202   | 0.308217792486922  |
| 5 rs3248569l | 60987038  | 0.00234750790387948  | 0.133619440884159  | 0.00468708505652436  | 0.0672086712936497  | 0.0808410398175951  | 0.217386046682744  |
| 5 rs3406054l | 91689095  | 0.00397319232534068  | 0.282103084614936  | 0.0089334242157285   | 0.452112550859205   | 0.611786989741744   | 0.706881550413125  |
| 5 rs3252929l | 68113700  | 0.00435423749058112  | 0.156253727879725  | 0.00405731388015963  | 0.0290921868274099  | 0.167410473691883   | 0.119858109663279  |
| 5 rs3221735l | 93643550  | 0.00518010511253322  | 0.126472457522564  | 0.00453988543419882  | 0.038067091267044   | 0.0249733425825814  | 0.184464501670414  |
| 5 rs3259384l | 55261851  | 0.00634345540510123  | 0.133496740048764  | 0.00986035483605733  | 0.181378831810969   | 0.0813935819926274  | 0.138043465061549  |
| 5 rs3266913l | 8416027   | 0.00900817676074971  | 0.215527310303848  | 0.0113503377253331   | 0.191655146996718   | 0.0921008401389851  | 0.108837474871833  |
| 5 rs3273005l | 19367674  | 0.00985649404628159  | 0.0564701260322917 | 0.0047286900863481   | 0.0838819034606732  | 0.1353724455227     | 0.34346356020484   |
| 5 rs3232289l | 17953314  | 0.00985649404628162  | 0.0564701260322921 | 0.00472869008634815  | 0.0838819034606732  | 0.1353724455227     | 0.343436356020484  |
| 5 rs3368090l | 18961952  | 0.0122998694550656   | 0.319026194362888  | 0.0109148950087957   | 0.459433349368789   | 0.418786362974138   | 0.324957531035751  |
| 5 rs8094090l | 60975506  | 0.0134303833855333   | 0.212798877957417  | 0.0113901633662414   | 0.177668394142462   | 0.330283461842705   | 0.364728356517652  |
| 5 rs3454937l | 62806342  | 0.0140251023417634   | 0.284297458032763  | 0.0104377489522937   | 0.0113648194662068  | 0.130501463842381   | 0.0707134573069256 |
| 5 rs3281344l | 82957799  | 0.0147529758889048   | 0.0754089926608732 | 0.00104849606955726  | 0.158864433111975   | 0.1424810979772     | 0.304878966405801  |
| 5 rs3182513l | 16489548  | 0.0157826200900831   | 0.0859162372872122 | 0.00750617955193126  | 0.146883495325359   | 0.05185673163794    | 0.137553225862056  |
| 5 rs3423553l | 68020390  | 0.0225251537626755   | 0.0146308921454253 | 0.00467555310301955  | 0.153197322132427   | 0.0509530759431756  | 0.062178039468669  |
| 5 rs3264546l | 12378190  | 0.0227799054393947   | 0.276758994527819  | 0.00819034969161356  | 0.284446599750937   | 0.161468289047792   | 0.411154904885071  |
| 5 rs3371922l | 14039327  | 0.0235592452738063   | 0.0217457602939702 | 0.006673141028309562 | 0.171316215867492   | 0.25936364919536    | 0.355954476183527  |
| 5 rs3319973l | 68122728  | 0.0239820431767606   | 0.136024587351487  | 0.00803504042779756  | 0.183649165028304   | 0.0816956466571576  | 0.333089354800837  |
| 5 rs3316845l | 12453637  | 0.0281369354327813   | 0.0334822001252552 | 0.00273459287178072  | 0.0800759446173637  | 0.148143367879294   | 0.207424198517441  |
| 5 rs3323935l | 16354547  | 0.0281369354327813   | 0.0334822001252552 | 0.00273459287178072  | 0.0800759446173637  | 0.148143367879294   | 0.207424198517441  |
| 5 rs3342498l | 81901918  | 0.0311845898403254   | 0.304848557809486  | 0.00362223322582988  | 0.0820701807140629  | 0.0683137568965588  | 0.2888768699383    |
| 5 rs3192186l | 3357382   | 0.0323155459869488   | 0.123613607746095  | 0.00166136499121992  | 0.144118129186053   | 0.0547424120064801  | 0.211814104418707  |
| 5 rs7054011l | 66274582  | 0.0328497705880348   | 0.0936318999141206 | 0.000636518089946905 | 0.22976510890032    | 0.0985008089894595  | 0.281624450523232  |
| 5 rs3387381l | 65090470  | 0.0374806874173427   | 0.0316300364078249 | 0.00307822146722933  | 0.0716901764108491  | 0.141956281374733   | 0.175181744180643  |
| 5 rs3258692l | 6376143   | 0.0385928018835511   | 0.039258260801242  | 0.0020973483419815   | 0.1083709070461     | 0.124254950900257   | 0.270667243436853  |
| 5 rs3221760l | 55272236  | 0.0397885563376042   | 0.0467834132850337 | 0.007213132594605    | 0.0991520616524839  | 0.197255422710453   | 0.28868887725119   |
| 5 rs3405474l | 55271773  | 0.0397885563376042   | 0.0467834132850337 | 0.007213132594605    | 0.0991520616524839  | 0.197255422710453   | 0.28868887725119   |
| 5 rs3291876l | 17309796  | 0.0418754125006006   | 0.02666197721      | 0.00602018454187987  | 0.0698284542576391  | 0.010619834599533   | 0.157064072591776  |
| 5 rs3243896l | 93644508  | 0.0423439049166626   | 0.0305292216582322 | 0.0051972576494507   | 0.100547004233657   | 0.158159406943658   | 0.241950145925271  |
| 5 rs3248021l | 17870001  | 0.043224880492149    | 0.0294789792596427 | 0.0073879697028076   | 0.175876625193924   | 0.0942855583678047  | 0.358929626040556  |
| 5 rs3240288l | 110956592 | 0.0521302891077157   | 0.0397433852087601 | 0.00424896676904203  | 0.107175104914169   | 0.159486211482951   | 0.274377339163397  |
| 5 rs3234360l | 92639746  | 0.0554010837399413   | 0.0478145742030704 | 0.00645116877857185  | 0.057036220926647   | 0.0254213347159629  | 0.0662326279056783 |
| 5 rs3240881l | 51211105  | 0.0592988945349682   | 0.124490528935717  | 0.00820982050377208  | 0.17729301940247    | 0.272878715093531   | 0.428941133771728  |
| 5 rs3185961l | 81902116  | 0.060422174441503    | 0.256104308886763  | 0.00861447036581959  | 0.400844723963345   | 0.222181306262374   | 0.30712441734359   |
| 5 rs3197153l | 2152069   | 0.0639644701842049   | 0.138284994893882  | 0.000390081215843048 | 0.190280674708346   | 0.358951539758381   | 0.41724758778236   |
| 5 rs3292691l | 99160710  | 0.066838646974747    | 0.0757715303270149 | 0.00708367881138732  | 0.132400086443694   | 0.0585641748203112  | 0.485902360696464  |
| 5 rs3232427l | 13688232  | 0.0707097967856695   | 0.236584948252975  | 0.0072760982557657   | 0.29396126596944    | 0.0562195130570979  | 0.335494432008197  |
| 5 rs3270603l | 86588554  | 0.0711996762831538   | 0.0356327581745502 | 0.00842122133352588  | 0.0563029146527469  | 0.0332950847721576  | 0.0889349666641569 |
| 5 rs3401056l | 16202736  | 0.0980713251139662   | 0.09134825582708   | 0.0080228579986218   | 0.153159776059518   | 0.00529420652322318 | 0.442058296973017  |
| 5 rs3214435l | 104173578 | 0.102682285061533    | 0.292583604544019  | 0.00554905574304077  | 0.499073614174831   | 0.302042229200757   | 0.409813417276747  |
| 5 rs3272265l | 6786632   | 0.117817345064997    | 0.497437233792469  | 0.00272523922787767  | 0.623680165667416   | 0.294095711343467   | 0.365174941677565  |
| 5 rs3332713l | 6786642   | 0.117817345064997    | 0.497437233792469  | 0.00272523922787767  | 0.623680165667416   | 0.294095711343467   | 0.365174941677565  |

|              |           |                      |                    |                      |                     |                     |                    |
|--------------|-----------|----------------------|--------------------|----------------------|---------------------|---------------------|--------------------|
| 5 rs7867811. | 83701336  | 0.118960736074306    | 0.137547732037402  | 0.00495624514960878  | 0.153496458663537   | 0.107314895990873   | 0.580717198031398  |
| 5 rs3315300. | 66187557  | 0.200840225665928    | 0.172497893483474  | 0.00246714788546428  | 0.286029447250287   | 0.0135503364310059  | 0.664941979398839  |
| 6 rs3369430. | 71814180  | 0.000426189610659292 | 0.407029649387076  | 0.00936023097976101  | 0.0318509498774393  | 0.0439997900215074  | 0.0863991332904634 |
| 6 rs5561857. | 71815493  | 0.000426189610659292 | 0.407029649387076  | 0.00936023097976101  | 0.0318509498774393  | 0.0439997900215074  | 0.0863991332904634 |
| 6 rs8121136. | 71813847  | 0.000426189610659292 | 0.407029649387076  | 0.00936023097976101  | 0.0318509498774393  | 0.0439997900215074  | 0.0863991332904634 |
| 6 rs3431263  | 16590090  | 0.000600810195219137 | 0.0497747245091346 | 0.00808036662380973  | 0.511230687250215   | 0.506742822311746   | 0.594511286384433  |
| 6 rs1969534. | 74620803  | 0.000636429928848084 | 0.169545244263159  | 0.0115484167938929   | 0.0325585225798912  | 0.0321704992041463  | 0.0811445735684432 |
| 6 rs3188903. | 59794727  | 0.000742942459994207 | 0.0871693744123082 | 0.000628388367751545 | 0.116670569142834   | 0.0641226131019795  | 0.167271672002719  |
| 6 rs3455185. | 92530686  | 0.00105058768481276  | 0.124370170368752  | 0.00237919198449954  | 0.206537965849907   | 0.264439781888731   | 0.229187502977951  |
| 6 rs3302088. | 71840571  | 0.00144684086048055  | 0.319022618857816  | 0.00698990203629959  | 0.00275739492034946 | 0.0171919710053231  | 0.0580468334595251 |
| 6 rs3385245. | 71840507  | 0.00144684086048055  | 0.319022618857816  | 0.00698990203629959  | 0.00275739492034946 | 0.0171919710053231  | 0.0580468334595251 |
| 6 rs3443594. | 71836585  | 0.00144684086048055  | 0.319022618857816  | 0.00698990203629959  | 0.00275739492034946 | 0.0171919710053231  | 0.0580468334595251 |
| 6 rs5561850. | 71838602  | 0.00144684086048055  | 0.319022618857816  | 0.00698990203629959  | 0.00275739492034946 | 0.0171919710053231  | 0.0580468334595251 |
| 6 rs8121416. | 62377063  | 0.00157070616271392  | 0.122103431960341  | 0.00293971956293916  | 0.165982873533157   | 0.0329988021547734  | 0.147356122173673  |
| 6 rs3298886  | 83034749  | 0.00188964785280309  | 0.371527066989518  | 0.0108943306066109   | 0.115365835773583   | 0.135628302940455   | 0.285585071394999  |
| 6 rs3352208. | 51440330  | 0.00207368479333777  | 0.0122338518728082 | 0.00156445174978065  | 0.367980032803343   | 0.361966233161177   | 0.434475401853545  |
| 6 rs3363629. | 92352163  | 0.00216512326866459  | 0.0972210698440105 | 0.00444202756933154  | 0.187020831243534   | 0.272351386903472   | 0.391915664577331  |
| 6 rs3194008. | 83003597  | 0.0022531813987609   | 0.346448417305446  | 0.0101236693134921   | 0.112146872044359   | 0.147796266084358   | 0.27357403904959   |
| 6 rs3200349. | 83010616  | 0.0022531813987609   | 0.346448417305446  | 0.0101236693134921   | 0.112146872044359   | 0.147796266084358   | 0.27357403904959   |
| 6 rs3342538. | 70335303  | 0.00307079881651106  | 0.120663527745057  | 0.00322583010776098  | 0.0456052565081967  | 0.0515562746935478  | 0.153798117259959  |
| 6 rs3287315. | 17427293  | 0.00343602181952184  | 0.317458191894124  | 0.0085709585663455   | 0.141764383596104   | 0.173141520275845   | 0.304545046432779  |
| 6 rs3303297  | 82845098  | 0.00377444169768312  | 0.0188245285166955 | 0.000674461831176758 | 0.241973637988387   | 0.218279813326386   | 0.138319101057746  |
| 6 rs7050902. | 71985363  | 0.00385673506141385  | 0.222837476520886  | 0.00579821354744367  | 0.0479527404609549  | 0.141387922394529   | 0.305475545767935  |
| 6 rs3199916. | 17195667  | 0.00489554901080079  | 0.0565262521754657 | 0.00299384077860338  | 0.178584229354843   | 0.142500158903247   | 0.29237882673265   |
| 6 rs3281409. | 40711613  | 0.00549992523658396  | 0.288819823661663  | 0.0107186125199987   | 0.129488481023272   | 0.138866269118606   | 0.233284513798508  |
| 6 rs3401065. | 47460452  | 0.00700391083631364  | 0.40522851817683   | 0.0114577922095602   | 0.032230745033088   | 0.0388200299762536  | 0.177157855774428  |
| 6 rs1072021. | 40620796  | 0.00718766141319144  | 0.0400633885517837 | 0.00840721711862735  | 0.0594938530984762  | 0.0684085016764279  | 0.086904297970935  |
| 6 rs3422204. | 16188284  | 0.00966829376017402  | 0.186925834804142  | 0.00330817904870814  | 0.0110494877180599  | 0.0209222141765046  | 0.0486181911538035 |
| 6 rs8149698. | 50017992  | 0.00985084614978863  | 0.0054236981995861 | 0.00215541696790526  | 0.19575536582363    | 0.0245174969048473  | 0.18787773709618   |
| 6 rs3391659  | 14340000  | 0.0116599304382871   | 0.259867849476111  | 0.00785857976470652  | 0.0860824736462267  | 0.131015880327337   | 0.111682845452123  |
| 6 rs3310223. | 145430640 | 0.0117142290455397   | 0.119853507231991  | 0.000653086879621816 | 0.170525211986441   | 0.0890041738133224  | 0.33408525217198   |
| 6 rs8082070. | 154028295 | 0.0122998694550655   | 0.319026194362889  | 0.0109148950087957   | 0.459433349368789   | 0.418786362974139   | 0.324957531035751  |
| 6 rs3374733  | 49801652  | 0.0123690513707778   | 0.0454347723867292 | 0.00986875514502982  | 0.304083583410689   | 0.0592205829132901  | 0.140336549751768  |
| 6 rs3418521. | 12056665  | 0.012496067440665    | 0.144926363032903  | 0.0064777903256169   | 0.187394255841171   | 0.099627806862863   | 0.329330380489863  |
| 6 rs3367249. | 71571886  | 0.0130678611339263   | 0.0818354444839078 | 0.00414238749559603  | 0.0657880254738404  | 0.0412847137013242  | 0.18099736219891   |
| 6 rs3323394. | 64395316  | 0.0139686660007038   | 0.154075746765721  | 0.0104678955220412   | 0.147652374609822   | 0.0702952249741271  | 0.281726641026217  |
| 6 rs3245715. | 42884865  | 0.0141387618238992   | 0.263636827739899  | 0.0115727790948953   | 0.080178497312974   | 0.00246783378767049 | 0.168972544395595  |
| 6 rs3265507. | 108763002 | 0.0143288807269363   | 0.0932682163431512 | 0.000305126909839114 | 0.205593216353807   | 0.157131701537014   | 0.345149642320848  |
| 6 rs4543210. | 51680668  | 0.0143886103950162   | 0.105977494134964  | 0.00655801079489506  | 0.104093039539945   | 0.0387642546875861  | 0.256860416650655  |
| 6 rs3350098. | 27540772  | 0.0144603741568211   | 0.0762644666824233 | 0.00103278118332942  | 0.0973174845372417  | 0.0391403348051446  | 0.141890677242107  |
| 6 rs3394538. | 90759392  | 0.0145039616901224   | 0.0939413445078209 | 0.000445158154429654 | 0.0294984290757697  | 0.0063362078858113  | 0.0665544651487686 |
| 6 rs3410749  | 146147009 | 0.0158082256120999   | 0.0891364023091027 | 0.00475230563515266  | 0.095827766891431   | 0.0609492228036242  | 0.223105198875156  |
| 6 rs3207851  | 140385645 | 0.02009368247608     | 0.0765910895928562 | 0.00334976217028632  | 0.109543262888374   | 0.0769785777942434  | 0.240779792456654  |
| 6 rs3282830. | 17427886  | 0.02242291151679     | 0.214848945325011  | 0.00170055789713602  | 0.345730647299695   | 0.351335872994518   | 0.409707039446474  |
| 6 rs8121489. | 82340995  | 0.02285931069757     | 0.114750900115713  | 0.00381927936852573  | 0.217524048671418   | 0.447294156675069   | 0.41261907933622   |
| 6 rs3216974. | 44687872  | 0.0234073476589881   | 0.210599061443396  | 0.0114838435421427   | 0.0133768875083331  | 0.042507229235867   | 0.0328513719429441 |



|              |           |                    |                    |                      |                    |                     |                    |
|--------------|-----------|--------------------|--------------------|----------------------|--------------------|---------------------|--------------------|
| 6 rs3282856l | 38149960  | 0.0234688919744756 | 0.129303429973012  | 0.00117565149580007  | 0.239743113704556  | 0.196874228258187   | 0.399796121647329  |
| 6 rs3280778l | 145436771 | 0.0247860489943933 | 0.10326059840363   | 0.00787492806418321  | 0.0135966678227093 | 0.0556609988360528  | 0.0356882962473368 |
| 6 rs3258046l | 83126740  | 0.0264680031254639 | 0.134030298459497  | 0.00489345501555053  | 0.0752657786761146 | 0.124266762453784   | 0.280257013919391  |
| 6 rs3291553l | 13291432  | 0.0267616520415122 | 0.054694603555742  | 0.00744032598504154  | 0.0349111602590405 | 0.147005380011823   | 0.213118378350685  |
| 6 rs3440770l | 113183373 | 0.0273843665516431 | 0.166479063268634  | 0.00566166656213164  | 0.104047424164176  | 0.0997636029172183  | 0.257749338991618  |
| 6 rs3206181l | 48269807  | 0.0281369354327813 | 0.0334822001252552 | 0.00273459287178072  | 0.0800759446173637 | 0.148143367879294   | 0.207424198517441  |
| 6 rs3223731l | 93656652  | 0.0281369354327813 | 0.0334822001252552 | 0.00273459287178072  | 0.0800759446173637 | 0.148143367879294   | 0.207424198517441  |
| 6 rs3326585l | 37922872  | 0.0281369354327813 | 0.0334822001252552 | 0.00273459287178072  | 0.0800759446173637 | 0.148143367879294   | 0.207424198517441  |
| 6 rs3424655l | 69396333  | 0.0281369354327813 | 0.0334822001252552 | 0.00273459287178072  | 0.0800759446173637 | 0.148143367879294   | 0.207424198517441  |
| 6 rs3430066l | 69396913  | 0.0281369354327813 | 0.0334822001252552 | 0.00273459287178072  | 0.0800759446173637 | 0.148143367879294   | 0.207424198517441  |
| 6 rs3450699l | 68868001  | 0.0281369354327813 | 0.0334822001252552 | 0.00273459287178072  | 0.0800759446173637 | 0.148143367879294   | 0.207424198517441  |
| 6 rs3350980l | 78336829  | 0.0321322911226503 | 0.12210762464253   | 0.0102351529917759   | 0.0754803050680386 | 0.125540975273747   | 0.269470253846817  |
| 6 rs3257805l | 111005152 | 0.0322943762763738 | 0.110285129440847  | 0.00912225679130924  | 0.133454389905956  | 0.0930237340191553  | 0.352231980374589  |
| 6 rs3186748l | 145449816 | 0.0325681726215984 | 0.324074111970198  | 0.00401317868352987  | 0.383143460227735  | 0.426380778618272   | 0.629281520203006  |
| 6 rs8121397l | 156396121 | 0.0341084634306828 | 0.0985425893006107 | 0.00927832055307103  | 0.0734637676063461 | 0.0583188186056521  | 0.258502264485862  |
| 6 rs5561859l | 119079398 | 0.0341511616373727 | 0.105862269815812  | 0.00412310986642569  | 0.146349892160458  | 0.0776329790418706  | 0.129503242744366  |
| 6 rs3338018l | 77131131  | 0.0371444842329245 | 0.0822289140230916 | 0.0025591220231982   | 0.0730111645316952 | 0.00899737805946426 | 0.112020209085186  |
| 6 rs3206314l | 16739670  | 0.0374806874173427 | 0.0316300364078249 | 0.00307822146722933  | 0.0716901764108491 | 0.141956281374733   | 0.175181744180643  |
| 6 rs3386721l | 40015072  | 0.0375539862284073 | 0.0352226415131383 | 0.00486190177636084  | 0.124803866116426  | 0.0371348796320453  | 0.0163713956035057 |
| 6 rs3304170l | 5312062   | 0.0407480418551054 | 0.0960155027325552 | 0.00444502290730534  | 0.101771323776675  | 0.0925824924068689  | 0.112086169537077  |
| 6 rs3435166l | 40711610  | 0.0413560032213152 | 0.0737123776321521 | 0.00905808992175972  | 0.322032871101972  | 0.376266666562749   | 0.655596077784639  |
| 6 rs3272737l | 81867862  | 0.0416534069941933 | 0.0115585009907638 | 0.00996243752139382  | 0.106345207571501  | 0.190308189561073   | 0.239554789872991  |
| 6 rs3292051l | 143553361 | 0.0423129862627431 | 0.0350624612767419 | 0.00420968011870026  | 0.0659188529058121 | 0.0532550293444501  | 0.192980914556024  |
| 6 rs3183022l | 34522188  | 0.0423439049166624 | 0.030529221658232  | 0.00519725764945061  | 0.100547004233657  | 0.158159406943658   | 0.241950145925271  |
| 6 rs3361135l | 38010621  | 0.0423439049166624 | 0.030529221658232  | 0.00519725764945061  | 0.100547004233657  | 0.158159406943658   | 0.241950145925271  |
| 6 rs3241002l | 90831305  | 0.0423439049166626 | 0.0305292216582322 | 0.0051972576494507   | 0.100547004233657  | 0.158159406943658   | 0.241950145925271  |
| 6 rs3337494l | 137280309 | 0.0423439049166626 | 0.0305292216582322 | 0.0051972576494507   | 0.100547004233657  | 0.158159406943658   | 0.241950145925271  |
| 6 rs3349471l | 90829826  | 0.0423439049166626 | 0.0305292216582322 | 0.0051972576494507   | 0.100547004233657  | 0.158159406943658   | 0.241950145925271  |
| 6 rs3360202l | 145448885 | 0.0423439049166626 | 0.0305292216582322 | 0.0051972576494507   | 0.100547004233657  | 0.158159406943658   | 0.241950145925271  |
| 6 rs3266292l | 25094719  | 0.0442722554573604 | 0.165328099251881  | 0.000724063950022747 | 0.164085968083006  | 0.289113223713432   | 0.354975809487402  |
| 6 rs3342311l | 40025003  | 0.0456246881450819 | 0.0500961093832244 | 0.00774186285379385  | 0.142872109003118  | 0.207531081910706   | 0.29683566079241   |
| 6 rs3403421l | 57852280  | 0.0489502677721978 | 0.0253263717314747 | 0.00985724218876107  | 0.145002333746555  | 0.224286069033868   | 0.331790249423866  |
| 6 rs3297702l | 104384185 | 0.0492595268788747 | 0.0398455970608279 | 0.0100996321963378   | 0.0621814169428306 | 0.224434409443027   | 0.217081696648     |
| 6 rs3205456l | 14649938  | 0.0501951961305051 | 0.364985919700094  | 0.00976060772523263  | 0.19261216419145   | 0.0707595221855241  | 0.317887858228313  |
| 6 rs3257593l | 141230791 | 0.0505281385370427 | 0.318269177341164  | 0.00145394623540314  | 0.0921401733861979 | 0.101172361422515   | 0.0720108330080456 |
| 6 rs3446279l | 48213063  | 0.0524124377940403 | 0.0177731995752471 | 0.0110205632488151   | 0.0245260425833747 | 0.13699016817935    | 0.183918296127482  |
| 6 rs3442946l | 90781658  | 0.0524916952828347 | 0.03331250803127   | 0.00893284860702472  | 0.102428041825769  | 0.164747921309111   | 0.260604584507048  |
| 6 rs3254637l | 54382137  | 0.0527523974348899 | 0.131734794399077  | 0.00349545544336907  | 0.323275420563996  | 0.0108439721954363  | 0.299865450908317  |
| 6 rs8121086l | 16567311  | 0.0551513127841433 | 0.0405664435419737 | 0.0012045730311184   | 0.158313093517728  | 0.0365380754012724  | 0.239729080460855  |
| 6 rs3380418l | 145415425 | 0.0582262129245834 | 0.135560236984669  | 0.00170003817340566  | 0.0998138517074317 | 0.0139043953524471  | 0.190225740484043  |
| 6 rs3432361l | 155180452 | 0.0584205875485015 | 0.412843096504391  | 0.00880408719888951  | 0.396282496777121  | 0.512662781020422   | 0.655831414256239  |
| 6 rs3446221l | 145432538 | 0.0596500175104572 | 0.0500823805721316 | 0.00759837605459784  | 0.196166862998233  | 0.257302866447435   | 0.40919779570916   |
| 6 rs3453406l | 4216676   | 0.0628669110452345 | 0.189388322598304  | 0.00500618038617336  | 0.202886528584151  | 0.0501355125306913  | 0.24280184071525   |
| 6 rs3232235l | 12710247  | 0.0684651254507353 | 0.0369127711554234 | 0.00732271281701228  | 0.063070454509679  | 0.0487986764187748  | 0.0860632722896531 |
| 6 rs3275805l | 12056361  | 0.0698490022378171 | 0.0230592840455141 | 0.0115966244847497   | 0.154114799415033  | 0.193363626396146   | 0.341114502046823  |
| 6 rs5561926l | 81869984  | 0.0714331130592373 | 0.0425785278327702 | 0.00967316540695786  | 0.133433858403078  | 0.22139747923303    | 0.285092725444293  |

|             |           |                      |                     |                      |                     |                    |                     |
|-------------|-----------|----------------------|---------------------|----------------------|---------------------|--------------------|---------------------|
| 6 rs3315291 | 111623624 | 0.0714662456892575   | 0.0658896422531099  | 0.00459289103088497  | 0.977369433129221   | 0.59645784938219   | 0.764426179564521   |
| 6 rs3375237 | 42902751  | 0.0781853747465358   | 0.0417137977487229  | 0.0112802203627097   | 0.31132188119136    | 0.201991971438229  | 0.402459176604888   |
| 6 rs3271016 | 92051495  | 0.0785213558143473   | 0.0579412657042112  | 0.0106625309826886   | 0.162670897316063   | 0.256735177556632  | 0.316891008464154   |
| 6 rs8121289 | 73129339  | 0.0785213558143476   | 0.0579412657042113  | 0.0106625309826887   | 0.162670897316064   | 0.256735177556632  | 0.316891008464154   |
| 6 rs3402920 | 18007118  | 0.0825798891640415   | 0.130745241307976   | 0.00932696555329437  | 0.503996319248578   | 0.412900554297323  | 0.539202096658263   |
| 6 rs3382564 | 145450588 | 0.0863623232492014   | 0.00799521961073149 | 0.0102162104968229   | 0.165088727578612   | 0.238322853748593  | 0.3157336181445     |
| 6 rs3374469 | 45127264  | 0.0880494558726699   | 0.0594118125364206  | 0.0107263882884708   | 0.196146586284531   | 0.293790928885554  | 0.408524535294538   |
| 6 rs3236535 | 77348591  | 0.0951666569316175   | 0.309040492286656   | 0.00505581720557285  | 0.306736855361041   | 0.219632890964805  | 0.68617311095134    |
| 6 rs8121856 | 23714643  | 0.0979735073202691   | 0.12606293028056    | 0.00295813504173337  | 0.231777748493963   | 0.0458747866637894 | 0.128166146665249   |
| 6 rs3427957 | 12242162  | 0.104265621980776    | 0.5925500839081     | 0.155508310359487    | 0.00729056764500566 | 0.151544796502458  | 0.00309262632987666 |
| 6 rs3185396 | 152539284 | 0.106552413048522    | 0.185172497309879   | 0.00685576160978756  | 0.114229448959528   | 0.0361559340482251 | 0.213655443173903   |
| 6 rs3408694 | 4473767   | 0.108019884325931    | 0.0924540775371951  | 0.00607427614213815  | 0.276375443150793   | 0.0449715087062334 | 0.37248958241577    |
| 6 rs3305202 | 53298177  | 0.10916022758873     | 0.30317315061714    | 0.00521334629581153  | 0.42928466540967    | 0.0868216901183488 | 0.374659374659828   |
| 6 rs3338204 | 71511833  | 0.116957790573574    | 0.648506376753561   | 0.0117998287140315   | 0.0354528471869374  | 0.218695140607907  | 0.171402599964901   |
| 6 rs3389686 | 134913501 | 0.117194520170357    | 0.181703644879933   | 0.00792143690585063  | 0.39248703478603    | 0.144285093231961  | 0.339057306208321   |
| 6 rs3370208 | 155340806 | 0.124196799809035    | 0.51868744117301    | 0.0107596382028973   | 0.103261581762071   | 0.278524984680196  | 0.243424619930044   |
| 6 rs3221042 | 141388208 | 0.12688447498836     | 0.121290439828212   | 0.00368474252736588  | 0.251378440528001   | 0.0599572266300806 | 0.422454880414405   |
| 6 rs3281074 | 155180863 | 0.145926987903056    | 0.363409663725667   | 0.00929578322080775  | 0.160489546319724   | 0.138934138818463  | 0.0496909286745996  |
| 6 rs3273761 | 154050379 | 0.274350033011803    | 0.300452909281252   | 0.00976205966356232  | 0.515353301364508   | 0.163823932966832  | 0.285634627456072   |
| 6 rs3447828 | 77203835  | 0.281456188139147    | 0.706158620662174   | 0.00240709314863607  | 0.424112564387182   | 0.564816060742509  | 0.666634110413573   |
| 6 rs3351849 | 5141032   | 0.615622217232209    | 0.165552291115996   | 0.000419642148041214 | 0.560688021516316   | 0.0396180133788311 | 0.876139434099243   |
| 6 rs3282641 | 141543733 | 0.720496761339335    | 0.653976865607154   | 0.0107697445655904   | 0.395296551122662   | 0.306102995848484  | 0.0643157350936327  |
| 7 rs3207913 | 48167285  | 0.00049418590366574  | 0.0442731022504209  | 0.000255349768038171 | 0.0952094938500478  | 0.12832272047956   | 0.188930582330368   |
| 7 rs3247976 | 14559378  | 0.000600810195219209 | 0.0497747245091339  | 0.00808036662380944  | 0.511230687250214   | 0.506742822311746  | 0.594511286384434   |
| 7 rs3194442 | 43488686  | 0.000865105741409581 | 0.186885295322831   | 0.00860542616744473  | 0.0847541094400136  | 0.183492971021325  | 0.327404114483373   |
| 7 rs3352797 | 43488649  | 0.000865105741409581 | 0.186885295322831   | 0.00860542616744473  | 0.0847541094400136  | 0.183492971021325  | 0.327404114483373   |
| 7 rs3351221 | 39244687  | 0.00300092963884998  | 0.102805372068004   | 0.00635578638655458  | 0.237614068761293   | 0.046629766521711  | 0.332085786463857   |
| 7 rs3273363 | 43381113  | 0.00306254987624909  | 0.082843990734524   | 0.0105284299013377   | 0.166838524575885   | 0.356908130399334  | 0.418038090700523   |
| 7 rs3298533 | 34988786  | 0.00372151927463825  | 0.0196924115748562  | 0.00101368450806551  | 0.210094943531612   | 0.108103511637149  | 0.358182629082989   |
| 7 rs3221092 | 26956005  | 0.00847167087359107  | 0.24537183453734    | 0.0114009678950628   | 0.00899931642834717 | 0.0359732257969207 | 0.0781014753564317  |
| 7 rs3418833 | 60145787  | 0.00900817676074971  | 0.215527310303848   | 0.0113503377253332   | 0.191655146996718   | 0.092100840138985  | 0.108837474871835   |
| 7 rs4543156 | 26944896  | 0.0105423618780452   | 0.101301748559874   | 0.0115366104812956   | 0.0419866566943119  | 0.0874317869741427 | 0.14270911772428    |
| 7 rs3344364 | 50147776  | 0.0137758134004138   | 0.229106511341943   | 0.0078129351842324   | 0.0176524563097507  | 0.0378197023994903 | 0.0291077139158124  |
| 7 rs3339039 | 20486636  | 0.0171387467852789   | 0.208716703553595   | 0.00512186716322155  | 0.103773536020519   | 0.0997602690099982 | 0.229193940260208   |
| 7 rs3293039 | 43489263  | 0.017778762337844    | 0.234818674926101   | 0.00917384764943042  | 0.0285879952608593  | 0.0809744526475702 | 0.0250429680161596  |
| 7 rs7062927 | 48148406  | 0.0233247293287754   | 0.0960302511344066  | 0.00930116941622356  | 0.100094378809166   | 0.0362045913773977 | 0.126774269236619   |
| 7 rs3449043 | 5313125   | 0.0247354947194507   | 0.0143242072125587  | 0.00578601127940731  | 0.244217554622882   | 0.268648115272985  | 0.250093022801771   |
| 7 rs7069317 | 22545762  | 0.0262496250638064   | 0.0152879585799422  | 0.00518632132210136  | 0.0817029100852417  | 0.174657862939988  | 0.199870049127405   |
| 7 rs3443670 | 26934403  | 0.0273116482881819   | 0.0304068767793127  | 0.00101692651745404  | 0.0761529250219778  | 0.0945106392687725 | 0.214952797733935   |
| 7 rs3218876 | 69923603  | 0.0281369354327813   | 0.0334822001252552  | 0.00273459287178072  | 0.0800759446173637  | 0.148143367879294  | 0.207424198517441   |
| 7 rs3386937 | 26716321  | 0.0289313219262311   | 0.130962159927636   | 0.00127520298749568  | 0.159505215414417   | 0.021322271230145  | 0.197522391856188   |
| 7 rs3206237 | 48302254  | 0.0305511572115682   | 0.242730351449853   | 0.00616479787691406  | 0.102475187255201   | 0.126630418070983  | 0.309569531611924   |
| 7 rs3243723 | 48302700  | 0.0305511572115682   | 0.242730351449853   | 0.00616479787691406  | 0.102475187255201   | 0.126630418070983  | 0.309569531611924   |
| 7 rs3299314 | 48301865  | 0.0305511572115682   | 0.242730351449853   | 0.00616479787691406  | 0.102475187255201   | 0.126630418070983  | 0.309569531611924   |
| 7 rs3300797 | 48301770  | 0.0305511572115682   | 0.242730351449853   | 0.00616479787691406  | 0.102475187255201   | 0.126630418070983  | 0.309569531611924   |
| 7 rs3312579 | 48683267  | 0.0305511572115682   | 0.242730351449853   | 0.00616479787691406  | 0.102475187255201   | 0.126630418070983  | 0.309569531611924   |

|              |          |                     |                     |                      |                    |                     |                    |
|--------------|----------|---------------------|---------------------|----------------------|--------------------|---------------------|--------------------|
| 7 rs3341890  | 48702834 | 0.0305511572115682  | 0.242730351449853   | 0.00616479787691406  | 0.102475187255201  | 0.126630418070983   | 0.309569531611924  |
| 7 rs3355181  | 48679808 | 0.0305511572115682  | 0.242730351449853   | 0.00616479787691406  | 0.102475187255201  | 0.126630418070983   | 0.309569531611924  |
| 7 rs3394379  | 48679528 | 0.0305511572115682  | 0.242730351449853   | 0.00616479787691406  | 0.102475187255201  | 0.126630418070983   | 0.309569531611924  |
| 7 rs3400083  | 48301777 | 0.0305511572115682  | 0.242730351449853   | 0.00616479787691406  | 0.102475187255201  | 0.126630418070983   | 0.309569531611924  |
| 7 rs3419683  | 48302896 | 0.0305511572115682  | 0.242730351449853   | 0.00616479787691406  | 0.102475187255201  | 0.126630418070983   | 0.309569531611924  |
| 7 rs3450706  | 48148191 | 0.0312038445697374  | 0.0766479631596543  | 0.00167866282053985  | 0.113446493986761  | 0.00364389692620755 | 0.226899781339499  |
| 7 rs3330967  | 34139052 | 0.032548980699728   | 0.259946096789521   | 0.00575579567406904  | 0.312248240701616  | 0.310264000632618   | 0.164434648964626  |
| 7 rs3385325  | 27723100 | 0.0333964716172245  | 0.0295402098984687  | 0.00789511093400068  | 0.131771930063165  | 0.180514123675543   | 0.281724118561053  |
| 7 rs3261642  | 83499676 | 0.0370778252356937  | 0.0483447581070779  | 0.00393578186074217  | 0.144725511847866  | 0.189748275975309   | 0.293462644116993  |
| 7 rs3243846  | 34159557 | 0.0383732230922472  | 0.00986075594435934 | 0.0107112233065036   | 0.0254742071225032 | 0.0687316195578368  | 0.195033579421093  |
| 7 rs3187631  | 26674524 | 0.0384989191581018  | 0.158334429884226   | 0.00651374515012988  | 0.220863629868409  | 0.01525149748365    | 0.22821576470133   |
| 7 rs6996410  | 3379381  | 0.0422246543989796  | 0.0596987567543704  | 0.00957287836768103  | 0.134033739894687  | 0.162766082831112   | 0.291019849261645  |
| 7 rs3385918  | 83021324 | 0.0423439049166626  | 0.0305292216582322  | 0.0051972576494507   | 0.100547004233657  | 0.158159406943658   | 0.241950145925271  |
| 7 rs3452857  | 29490473 | 0.0423439049166626  | 0.0305292216582322  | 0.0051972576494507   | 0.100547004233657  | 0.158159406943658   | 0.241950145925271  |
| 7 rs3203194  | 39021117 | 0.048644579725352   | 0.163843177541755   | 0.00224746508908245  | 0.461879346197824  | 0.320635715785472   | 0.579450153206223  |
| 7 rs3460920  | 45119851 | 0.0501951961305049  | 0.364985919700094   | 0.00976060772523251  | 0.192612164191449  | 0.0707595221855234  | 0.317887858228314  |
| 7 rs3317900  | 53312588 | 0.0503065802008086  | 0.0443298075299265  | 0.00708297855853052  | 0.13630886642086   | 0.200001779111119   | 0.260346854535767  |
| 7 rs3411698  | 164571   | 0.0510106976824026  | 0.121857357236951   | 0.00719096088984983  | 0.18081813586625   | 0.171670516604897   | 0.604287495069675  |
| 7 rs8098986  | 24817635 | 0.0527523974348899  | 0.131734794399077   | 0.00349545544336907  | 0.323275420563996  | 0.0108439721954363  | 0.299865450908317  |
| 7 rs3274195  | 14642240 | 0.0534481716839414  | 0.0454183090182425  | 0.0085664956667894   | 0.0393935553551667 | 0.0439080215768208  | 0.0567214287547951 |
| 7 rs3348875  | 48119706 | 0.0550960476076542  | 0.230027361440738   | 0.00154640201383482  | 0.462301434449888  | 0.232543610131101   | 0.368609311901224  |
| 7 rs3416029  | 83565184 | 0.0559046028827726  | 0.0510189170690959  | 0.00402197279485976  | 0.137960402455141  | 0.197438424930666   | 0.263677704217599  |
| 7 rs3268831  | 29179813 | 0.0582262129245834  | 0.135560236984669   | 0.00170003817340566  | 0.0998138517074317 | 0.0139043953524471  | 0.190225740484043  |
| 7 rs3451960  | 48119733 | 0.0586730771668969  | 0.109574955424403   | 0.00263557583719043  | 0.126094756846528  | 0.0226010583689447  | 0.244192865861403  |
| 7 rs7895489  | 12889502 | 0.0593079790780498  | 0.0469513747642266  | 0.0104089509989761   | 0.129452249256911  | 0.198580155365976   | 0.294054174599176  |
| 7 rs3364304  | 39254889 | 0.0599076161847083  | 0.0386748919027193  | 0.00844436169525681  | 0.127010164718971  | 0.218891681799556   | 0.27001764870492   |
| 7 rs3211475  | 34273946 | 0.0601384312871527  | 0.0493290774608907  | 0.00607287849388855  | 0.076501298987657  | 0.0661747872573279  | 0.352036005940515  |
| 7 rs3278689  | 73129138 | 0.0612769579968838  | 0.0687213289146143  | 0.00522611983018175  | 0.125084677001417  | 0.0395191860871034  | 0.0189578467360237 |
| 7 rs6912341  | 45103099 | 0.062491062296256   | 0.0240020381868494  | 0.00387546136428229  | 0.0557176201846661 | 0.0191929316122268  | 0.0833673520532846 |
| 7 rs3412879  | 27716349 | 0.0678532655769085  | 0.0146925674297649  | 0.0117379384627832   | 0.0636799823204162 | 0.0514996063310187  | 0.109737943496289  |
| 7 rs3379302  | 43492696 | 0.0701470618344268  | 0.0150726059357071  | 0.00978102080494694  | 0.0180430067112363 | 0.0983307013784149  | 0.117269185520622  |
| 7 rs8094509  | 43526977 | 0.0701470618344268  | 0.0150726059357071  | 0.00978102080494694  | 0.0180430067112363 | 0.0983307013784149  | 0.117269185520622  |
| 7 rs8079728  | 43492620 | 0.070147061834427   | 0.0150726059357071  | 0.00978102080494697  | 0.0180430067112363 | 0.0983307013784151  | 0.117269185520622  |
| 7 rs3380517  | 83499712 | 0.0812238968541305  | 0.236680328173204   | 0.0103103367673732   | 0.181244928288291  | 0.228862519948055   | 0.369639454006458  |
| 7 rs1071993  | 83456587 | 0.0850947174449569  | 0.305186368539204   | 0.00350970876916144  | 0.349993106668155  | 0.0723361105606238  | 0.437598961976733  |
| 7 rs3382361  | 27986368 | 0.0930072924592136  | 0.0414084313859985  | 0.00586873405247668  | 0.164046228708889  | 0.0965402383306578  | 0.41880097361513   |
| 7 rs3280714  | 1784251  | 0.0939456293774722  | 0.258515003510153   | 0.00546379067036335  | 0.35656309272086   | 0.0767681416154591  | 0.0681358055297702 |
| 7 rs3296040  | 33117119 | 0.112554699218017   | 0.101429607669527   | 0.011376177484178    | 0.253614943540077  | 0.202810974238103   | 0.328081443962162  |
| 7 rs3300787  | 27567531 | 0.114321523165386   | 0.0361497890464097  | 0.00966329298025029  | 0.202630388236668  | 0.268913206938348   | 0.2615245899997    |
| 7 rs3353160  | 27602815 | 0.115525617421159   | 0.226237975400558   | 0.00525660467133448  | 0.108417361809107  | 0.131447204075315   | 0.202514430955498  |
| 7 rs3422675  | 24818070 | 0.141902558539361   | 0.172384166894976   | 0.00696272018492925  | 0.353544315825356  | 0.136576362913159   | 0.205051675353249  |
| 7 rs3343584  | 24117546 | 0.274350033011803   | 0.300452909281252   | 0.00976205966356217  | 0.515353301364509  | 0.163823932966832   | 0.285634627456071  |
| 7 rs3321848  | 14563442 | 0.756622732848534   | 0.19005358646771    | 0.0019935994792331   | 0.27290409658073   | 0.956612975104325   | 0.31609110162821   |
| 10 rs3218929 | 71227207 | 0.00527102828440784 | 0.0239766535893001  | 0.0029946104941769   | 0.075654449861034  | 0.0860769912905731  | 0.248735187592743  |
| 10 rs3384928 | 35067331 | 0.00707466197979936 | 0.526255444918104   | 0.0105186592785239   | 0.0275264948603564 | 0.0555223848180175  | 0.257643729306482  |
| 10 rs3348051 | 29217609 | 0.00726369716801976 | 0.0533117240319091  | 0.000316020169650435 | 0.135115261816779  | 0.104570561208607   | 0.268966200316102  |

|              |                               |                     |                      |                     |                     |                    |
|--------------|-------------------------------|---------------------|----------------------|---------------------|---------------------|--------------------|
| 10 rs3189779 | 61652537 0.0089172527597436   | 0.1693928004128     | 0.00176184953734942  | 0.172814551728678   | 0.21381041579428    | 0.400675688129151  |
| 10 rs3396714 | 52884599 0.0100173383182429   | 0.100613892950313   | 0.00934063926297526  | 0.121067382744463   | 0.262901553916252   | 0.354444907483253  |
| 10 rs3449888 | 15053131 0.0101497993578925   | 0.0370812128098592  | 0.000239005375768452 | 0.102232900641036   | 0.0618156566215356  | 0.25288846587492   |
| 10 rs3257384 | 29520123 0.0122998694550659   | 0.319026194362887   | 0.0109148950087953   | 0.459433349368788   | 0.418786362974138   | 0.32495753103575   |
| 10 rs3241382 | 14937143 0.0127557627050202   | 0.0493150756391057  | 0.00197229463126039  | 0.151028582184514   | 0.10235227657056    | 0.2342795888793    |
| 10 rs3361492 | 14937171 0.0127557627050202   | 0.0493150756391057  | 0.00197229463126039  | 0.151028582184514   | 0.10235227657056    | 0.2342795888793    |
| 10 rs3369775 | 65735350 0.0139686660007038   | 0.154075746765721   | 0.0104678955220412   | 0.147652374609822   | 0.0702952249741271  | 0.281726641026217  |
| 10 rs3268991 | 28397620 0.0139686660007038   | 0.154075746765722   | 0.0104678955220412   | 0.147652374609823   | 0.0702952249741266  | 0.281726641026216  |
| 10 rs3339725 | 18750591 0.0143288807269363   | 0.0932682163431512  | 0.000305126909839114 | 0.205593216353807   | 0.157131701537014   | 0.345149642320848  |
| 10 rs3222225 | 65807958 0.0171387467852789   | 0.208716703553595   | 0.00512186716322155  | 0.103773536020519   | 0.0997602690099982  | 0.229193940260208  |
| 10 rs3395807 | 47235383 0.0182415018496304   | 0.182854577314135   | 0.000778787749655973 | 0.230765025792444   | 0.311667841695452   | 0.439422513582524  |
| 10 rs3307710 | 16759791 0.0187603726690894   | 0.0293753493854075  | 0.000651880562790478 | 0.0785857285376566  | 0.0282054690334361  | 0.266213003286606  |
| 10 rs3295339 | 21916161 0.0188712371296138   | 0.395548818001198   | 0.0101255616414295   | 0.389256386835963   | 0.164797938254059   | 0.268184661300686  |
| 10 rs3299982 | 38205963 0.0190220478818779   | 0.0814883227934527  | 0.0026284655192081   | 0.387880498681907   | 0.418934529748714   | 0.62400876515185   |
| 10 rs3391149 | 48960256 0.0223363284575019   | 0.0341170075188855  | 0.000356343382840642 | 0.197997021447175   | 0.142647534001136   | 0.291586260919258  |
| 10 rs3194821 | 61452526 0.0275796200185951   | 0.727163368230843   | 0.0111422095739297   | 0.274484607108584   | 0.310355925984846   | 0.4404649385256    |
| 10 rs3413832 | 12288033 0.0281369354327813   | 0.0334822001252552  | 0.00273459287178072  | 0.0800759446173637  | 0.148143367879294   | 0.207424198517441  |
| 10 rs3458380 | 24606321 0.0281369354327813   | 0.0334822001252552  | 0.00273459287178072  | 0.0800759446173637  | 0.148143367879294   | 0.207424198517441  |
| 10 rs4543040 | 16021616 0.028448072336869    | 0.254646107121536   | 0.00604921746266042  | 0.0865630856307416  | 0.144854285500087   | 0.251074569812767  |
| 10 rs8121813 | 29289496 0.0289313219262311   | 0.130962159927636   | 0.00127520298749568  | 0.159505215414417   | 0.021322271230145   | 0.197522391856187  |
| 10 rs3449843 | 56131102 0.0295902906644405   | 0.1082009641437     | 0.00357230990764316  | 0.118357461495387   | 0.06702627087556335 | 0.157134067439611  |
| 10 rs7009757 | 47234866 0.0381910747228294   | 0.104116671730659   | 0.0109476065559976   | 0.0879856605998176  | 0.207830754320399   | 0.269284795569687  |
| 10 rs3417672 | 24616331 0.0405279977195073   | 0.0260730701631047  | 0.0104071807563014   | 0.0995413306901122  | 0.215363132901609   | 0.238865420733693  |
| 10 rs8121160 | 37312422 0.0409397542289342   | 0.0458613718085365  | 0.00617423922003983  | 0.125906935730731   | 0.194054289974879   | 0.256585187758177  |
| 10 rs3194656 | 33123563 0.0458445550070329   | 0.444300498692909   | 0.00642766918443527  | 0.202546642720582   | 0.165108000897881   | 0.241749135731994  |
| 10 rs3183050 | 12318247 0.0515414110517716   | 0.00679035956784541 | 0.00544681527726169  | 0.0764288254928222  | 0.142083736334713   | 0.183931378679462  |
| 10 rs3430213 | 12275757 0.0515414110517716   | 0.00679035956784541 | 0.00544681527726169  | 0.0764288254928222  | 0.142083736334713   | 0.183931378679462  |
| 10 rs8142931 | 12516174 0.0515414110517716   | 0.00679035956784541 | 0.00544681527726169  | 0.0764288254928222  | 0.142083736334713   | 0.183931378679462  |
| 10 rs3243317 | 12259644 0.0516163379034001   | 0.0253401728218007  | 0.00896872704146589  | 0.0919545476109958  | 0.176038404815709   | 0.180777415170251  |
| 10 rs3234761 | 28234008 0.0534481716839419   | 0.0454183090182426  | 0.00856649566678947  | 0.0393935553551672  | 0.0439080215768211  | 0.0567214287547952 |
| 10 rs3243639 | 71209484 0.0550960476076538   | 0.230027361440741   | 0.00154640201383486  | 0.462301434449888   | 0.232543610131102   | 0.368609311901224  |
| 10 rs8121813 | 29289436 0.0550960476076542   | 0.230027361440738   | 0.00154640201383482  | 0.462301434449887   | 0.232543610131101   | 0.368609311901224  |
| 10 rs3341154 | 52885811 0.0589113358761958   | 0.0567300463006107  | 0.00141261935073568  | 0.251408809328441   | 0.0289414096519793  | 0.339630525701166  |
| 10 rs3208443 | 47055880 0.0628669110452342   | 0.189388322598304   | 0.00500618038617324  | 0.202886528584149   | 0.050135512530691   | 0.242801840715251  |
| 10 rs3352864 | 18266237 0.0657057413977186   | 0.212171540762785   | 0.00620682400106228  | 0.32835723394468    | 0.140893850686663   | 0.297412085533483  |
| 10 rs3446864 | 13570900 0.0722065745842442   | 0.245211664717632   | 0.0100752039616176   | 0.14593218204932    | 0.474906091195991   | 0.338009106445158  |
| 10 rs3421265 | 29915350 0.0828478926619924   | 0.0883041651564973  | 0.0117300557760055   | 0.0610739313765388  | 0.0604463553038947  | 0.139432304723292  |
| 10 rs3438988 | 17111931 0.08953349771456     | 0.595160842986821   | 0.0109132146968929   | 0.551988697823114   | 0.491027011773063   | 0.538026940570016  |
| 10 rs3316880 | 63659407 0.0895334977145609   | 0.59516084298682    | 0.0109132146968932   | 0.55198869782312    | 0.491027011773069   | 0.538026940570021  |
| 10 rs3226856 | 52884772 0.720496761339334    | 0.653976865607155   | 0.0107697445655902   | 0.395296551122661   | 0.306102995848487   | 0.0643157350936313 |
| 11 rs3378183 | 23598085 0.000600810195219209 | 0.0497747245091339  | 0.00808036662380944  | 0.511230687250214   | 0.506742822311746   | 0.594511286384434  |
| 11 rs3283312 | 86584930 0.0029916450634229   | 0.0499545751388017  | 0.00071753256048593  | 0.153377302824897   | 0.254564213265959   | 0.434690038565698  |
| 11 rs6905511 | 16000653 0.00398573926996396  | 0.073915916651581   | 0.00435571792117824  | 0.00426156011606779 | 0.0265583357409099  | 0.087128966496507  |
| 11 rs3463337 | 16001432 0.00658561784762909  | 0.24612229275519    | 0.00577649587864779  | 0.172338644149333   | 0.0458404219275824  | 0.244065293163741  |
| 11 rs3430671 | 22983721 0.0139686660007038   | 0.154075746765721   | 0.0104678955220412   | 0.147652374609822   | 0.0702952249741269  | 0.281726641026217  |
| 11 rs6955334 | 84410623 0.0139686660007038   | 0.154075746765722   | 0.0104678955220412   | 0.147652374609822   | 0.0702952249741269  | 0.281726641026217  |

|               |          |                     |                     |                      |                     |                    |                    |
|---------------|----------|---------------------|---------------------|----------------------|---------------------|--------------------|--------------------|
| 11 rs3449221' | 49591324 | 0.0189322115243488  | 0.226104815670564   | 0.00106996352920775  | 0.128761255706759   | 0.129931016966983  | 0.287620715020853  |
| 11 rs3367301' | 84430618 | 0.0207147127269841  | 0.398978242852886   | 0.00392204791223662  | 0.0897934544956558  | 0.107375553200132  | 0.251862462317142  |
| 11 rs3249517- | 72182983 | 0.0382823633971459  | 0.184684862851634   | 0.0103657034141617   | 0.0321727809265718  | 0.132747692635056  | 0.0569019952688678 |
| 11 rs3378415' | 15547041 | 0.0385928018835511  | 0.039258260801242   | 0.0020973483419815   | 0.10837089070461    | 0.124254950900257  | 0.270667243436853  |
| 11 rs3448639. | 13200489 | 0.0570384543653061  | 0.82560138669323    | 0.00989640251998851  | 0.395579850084292   | 0.450969622119291  | 0.698178903032404  |
| 11 rs3427941' | 84425045 | 0.0575405166772773  | 0.297441484161707   | 0.00130693761280844  | 0.361004845512349   | 0.10885357064203   | 0.290958074175211  |
| 11 rs3326893. | 83558514 | 0.0757722175843392  | 0.0394597503191056  | 0.010510440872434    | 0.0300216756682192  | 0.0241993913497556 | 0.0806033276668889 |
| 11 rs3389066  | 8641206  | 0.141902558539361   | 0.172384166894976   | 0.00696272018492905  | 0.353544315825357   | 0.136576362913159  | 0.20505167535325   |
| 12 rs8126097. | 21057842 | 0.00269864329876018 | 0.115008453263899   | 0.00591333284505199  | 0.156729361219237   | 0.0536271059539532 | 0.135431038857718  |
| 12 rs3321622. | 18430488 | 0.00289019515628126 | 0.169041273618502   | 0.00483959967660752  | 0.352376087624721   | 0.163133617762847  | 0.251523472840703  |
| 12 rs8121163' | 21054282 | 0.00293678666104732 | 0.214044132063643   | 0.00324901486455011  | 0.433886687612577   | 0.316985363705378  | 0.311245218249973  |
| 12 rs3189696. | 20427345 | 0.003170388142862   | 0.0570458858391232  | 0.00152660268656138  | 0.0570152219138726  | 0.0245814277332984 | 0.14541761596016   |
| 12 rs8121145. | 23969774 | 0.00459823146411799 | 0.289641363776296   | 0.0073203614799776   | 0.10913363816094    | 0.0713597861826559 | 0.239343453090078  |
| 12 rs3230303' | 1614758  | 0.00474388694294692 | 0.063098572963991   | 0.00293464972964983  | 0.0942147061899648  | 0.0586541193308844 | 0.0815364756080211 |
| 12 rs3426051' | 21008281 | 0.00511811103564341 | 0.167216474674265   | 0.00191113316135942  | 0.0425974080715475  | 0.0353904945896026 | 0.102785104539919  |
| 12 rs3444973. | 27633518 | 0.00715028737540831 | 0.0855617456966358  | 0.00124547200231988  | 0.247367006506817   | 0.310537307101251  | 0.45989271943532   |
| 12 rs3379898- | 55218746 | 0.0090401140130236  | 0.205289665192086   | 0.00459128199958514  | 0.361026400023593   | 0.294360944448912  | 0.242411544256994  |
| 12 rs3429928. | 62500771 | 0.0110924807133239  | 0.38152519348617    | 0.00736717489046361  | 0.149664061293691   | 0.442528692997093  | 0.657488521230425  |
| 12 rs3264645. | 14070119 | 0.0122998694550656  | 0.319026194362889   | 0.0109148950087956   | 0.459433349368788   | 0.418786362974139  | 0.324957531035751  |
| 12 rs3265015' | 16904270 | 0.0123690513707778  | 0.0454347723867292  | 0.00986875514502982  | 0.304083583410689   | 0.0592205829132901 | 0.140336549751768  |
| 12 rs7011088. | 20347069 | 0.0123690513707779  | 0.0454347723867294  | 0.00986875514502984  | 0.30408358341069    | 0.0592205829132901 | 0.140336549751768  |
| 12 rs3334126' | 49737749 | 0.0123721858252966  | 0.0341377094490213  | 0.00316825812964556  | 0.0645279709888548  | 0.0927693947188141 | 0.266336431458624  |
| 12 rs3307345' | 18310242 | 0.0124752927550246  | 0.0523046238435983  | 0.00144412504227871  | 0.192566520493036   | 0.175384607937267  | 0.253266179755378  |
| 12 rs3377202' | 14661877 | 0.0130332382622422  | 0.11383820643198    | 0.00541113097713924  | 0.142563107160947   | 0.148939348730586  | 0.3158645509435    |
| 12 rs3326340. | 26406250 | 0.0135287000890122  | 0.0791969168786385  | 0.000769783872109122 | 0.171076513543848   | 0.138560500076766  | 0.311610913998798  |
| 12 rs3340256- | 62669028 | 0.0139686660007038  | 0.154075746765721   | 0.0104678955220412   | 0.147652374609822   | 0.0702952249741271 | 0.281726641026217  |
| 12 rs3336204' | 62667823 | 0.0143886103950162  | 0.105977494134964   | 0.00655801079489506  | 0.104090309539945   | 0.0387642546875861 | 0.256860416650655  |
| 12 rs3226490. | 49682575 | 0.0145803379652084  | 0.217768393173981   | 0.00576356316748183  | 0.0708461273926868  | 0.0958088071469202 | 0.327005210035351  |
| 12 rs3269613- | 18310861 | 0.0151745856694042  | 0.128232176383587   | 0.00166062357307522  | 0.10100211239459    | 0.140823238827441  | 0.166197535782221  |
| 12 rs3340368. | 20463247 | 0.0184440424994286  | 0.115873883947784   | 0.0013271357969865   | 0.181062311926016   | 0.209785948418064  | 0.398123662334083  |
| 12 rs3273510. | 54990249 | 0.0194823977119945  | 0.0301922102182299  | 0.0102048048415568   | 0.637597672978981   | 0.489063989064286  | 0.435647227336306  |
| 12 rs3410473- | 26406384 | 0.0211092387258506  | 0.0407223308347357  | 0.00308454605414309  | 0.0236825246932021  | 0.11021347717403   | 0.184297592954022  |
| 12 rs3215524. | 21280934 | 0.0234073476589882  | 0.210599061443396   | 0.0114838435421427   | 0.0133768875083331  | 0.042507229235867  | 0.032851371942944  |
| 12 rs3377621' | 4628217  | 0.0293149675243153  | 0.0662002973664014  | 0.000877694537335861 | 0.197893327956056   | 0.192065717793282  | 0.38078454988005   |
| 12 rs3356089. | 20247657 | 0.0294853919371986  | 0.0951640149960953  | 0.00684799268168592  | 0.0230384413702044  | 0.0534956523733169 | 0.073291756860693  |
| 12 rs3432031' | 57413445 | 0.0305511572115682  | 0.242730351449853   | 0.00616479787691409  | 0.102475187255201   | 0.126630418070983  | 0.309569531611924  |
| 12 rs3277908. | 57895614 | 0.0347221447325521  | 0.405456560941841   | 0.00882540589847648  | 0.140866304979835   | 0.123899092611302  | 0.338279467434534  |
| 12 rs8121333. | 57411427 | 0.0348670803628745  | 0.277377574922028   | 0.00735822920932682  | 0.00806762346851782 | 0.0329837443099851 | 0.146984890049233  |
| 12 rs3375897. | 5641783  | 0.0351860087293135  | 0.0280954517774762  | 0.00799175221585278  | 0.122566077450912   | 0.189313820324853  | 0.212478860884008  |
| 12 rs3284105. | 58069564 | 0.0390430832504373  | 0.112201184387281   | 0.00885809851630263  | 0.0137840505667177  | 0.0900221871425568 | 0.145674267528225  |
| 12 rs3421589. | 26359795 | 0.0392486703378339  | 0.15931515540409    | 0.00909254202208656  | 0.149527292295033   | 0.180339767493718  | 0.561065319602662  |
| 12 rs3281677' | 52120842 | 0.0423439049166624  | 0.0305292216582321  | 0.00519725764945061  | 0.100547004233656   | 0.158159406943658  | 0.241950145925271  |
| 12 rs3299788' | 49900886 | 0.0423439049166626  | 0.0305292216582322  | 0.0051972576494507   | 0.100547004233657   | 0.158159406943658  | 0.241950145925271  |
| 12 rs1969531- | 6455366  | 0.0429074509595119  | 0.00924126574957136 | 0.0104403888081755   | 0.382997380383807   | 0.395838550009598  | 0.453860361486676  |
| 12 rs1969576' | 6455357  | 0.0429074509595119  | 0.00924126574957136 | 0.0104403888081755   | 0.382997380383807   | 0.395838550009598  | 0.453860361486676  |
| 12 rs3261036' | 40083713 | 0.0461196123746731  | 0.236775596898578   | 0.00252245189910434  | 0.571177681807094   | 0.489102531598555  | 0.632791057875296  |

|              |           |                     |                    |                      |                     |                     |                    |
|--------------|-----------|---------------------|--------------------|----------------------|---------------------|---------------------|--------------------|
| 12 rs3409408 | 53966755  | 0.0501417103072301  | 0.0650880189630588 | 0.0110855634813187   | 0.149670123787678   | 0.265276112167557   | 0.349403482778131  |
| 12 rs3277368 | 41711487  | 0.0507600712482943  | 0.0872802310764549 | 0.00439067387304673  | 0.205110245941313   | 0.024859243522357   | 0.273220179130507  |
| 12 rs3383773 | 31729216  | 0.0586785873580505  | 0.188350742790788  | 0.0380237624818242   | 0.00390199396319151 | 0.00823805137347202 | 0.0409945447449151 |
| 12 rs3350718 | 8000086   | 0.0593079790780498  | 0.0469513747642266 | 0.0104089509989761   | 0.129452249256911   | 0.198580155365976   | 0.294054174599176  |
| 12 rs8147794 | 20454434  | 0.0610785033902774  | 0.0343573148679931 | 0.00977006730795662  | 0.094309640422393   | 0.1384222585538     | 0.277648283886708  |
| 12 rs3272916 | 53986383  | 0.0785213558143476  | 0.0579412657042113 | 0.0106625309826888   | 0.162670897316064   | 0.256735177556632   | 0.316891008464154  |
| 12 rs8144089 | 17124761  | 0.0786879683969808  | 0.0200369934477419 | 0.00658776481779931  | 0.0622191967558519  | 0.00234723418465798 | 0.100553462981442  |
| 12 rs3385944 | 15294939  | 0.086298386112371   | 0.0326139304213435 | 0.0050284028102855   | 0.155821687141888   | 0.18593073654187    | 0.290759472300092  |
| 12 rs3420381 | 46529091  | 0.0964338019238798  | 0.070879485413975  | 0.0109697532267288   | 0.206431096346623   | 0.244452906121095   | 0.277594614819416  |
| 12 rs3315845 | 40714061  | 0.108875109771773   | 0.282562095801702  | 0.00205860655010136  | 0.138690363427556   | 0.137931806018001   | 0.0299528886087258 |
| 12 rs3335796 | 62500763  | 0.110288691076882   | 0.135856443577609  | 0.00942528616186593  | 0.210243638558321   | 0.0175836715251498  | 0.540292693533708  |
| 12 rs3349424 | 75937     | 0.115249003483641   | 0.131086406731356  | 0.00419105049308714  | 0.396175761292702   | 0.328289565760042   | 0.359641319499559  |
| 12 rs3291076 | 55567965  | 0.283475669470564   | 0.293197206417267  | 0.0103355490993723   | 0.899467850942391   | 0.680807224014435   | 0.754399307702321  |
| 13 rs3302927 | 23695323  | 0.00151977032511054 | 0.0345419364740519 | 0.000788674329678462 | 0.126323685792635   | 0.145253622387328   | 0.23487383797612   |
| 13 rs3378701 | 170594040 | 0.00151977032511054 | 0.0345419364740519 | 0.000788674329678462 | 0.126323685792635   | 0.145253622387328   | 0.23487383797612   |
| 13 rs3235848 | 108078945 | 0.00301702286532553 | 0.0400503028057997 | 0.0038733369036709   | 0.252431961953409   | 0.288211063609022   | 0.336193677023128  |
| 13 rs3202535 | 73202125  | 0.00471996332819965 | 0.0628297563032198 | 0.00262305986983059  | 0.174807944758563   | 0.180538968182664   | 0.293205898109932  |
| 13 rs3198425 | 2572889   | 0.00726369716801977 | 0.0533117240319092 | 0.00031602016965044  | 0.13511526181678    | 0.104570561208607   | 0.268966200316102  |
| 13 rs3286285 | 12220534  | 0.00972957423498168 | 0.0869364423017083 | 0.000670731090372508 | 0.190854866441647   | 0.156206400019363   | 0.298076270358364  |
| 13 rs3433261 | 12220022  | 0.00972957423498168 | 0.0869364423017083 | 0.000670731090372508 | 0.190854866441647   | 0.156206400019363   | 0.298076270358364  |
| 13 rs3365955 | 81357569  | 0.00985649404628159 | 0.0564701260322917 | 0.0047286900863481   | 0.0838819034606732  | 0.1353724455227     | 0.343436356020484  |
| 13 rs8097959 | 34564939  | 0.00991044282642287 | 0.0983696726740425 | 0.00476878371837048  | 0.0346230810893803  | 0.15761632564387    | 0.265601498232543  |
| 13 rs3412895 | 24844900  | 0.0139686660007038  | 0.154075746765721  | 0.0104678955220412   | 0.147652374609822   | 0.0702952249741271  | 0.281726641026217  |
| 13 rs8093275 | 25179377  | 0.0139686660007038  | 0.154075746765721  | 0.0104678955220412   | 0.147652374609823   | 0.0702952249741265  | 0.281726641026216  |
| 13 rs3289111 | 90385316  | 0.0194463072751358  | 0.098367889971265  | 0.00125457603632987  | 0.141939438837048   | 0.137154892292116   | 0.349691355341811  |
| 13 rs3338873 | 210482884 | 0.024264322198402   | 0.0281448698930664 | 0.00745906134316106  | 0.0928340098021603  | 0.159809102587768   | 0.16502036834331   |
| 13 rs3279163 | 20618054  | 0.0260095355839012  | 0.309524662203798  | 0.00269416811464922  | 0.283413799182942   | 0.391187631404994   | 0.521032974511899  |
| 13 rs3421724 | 7996770   | 0.0281369354327813  | 0.0334822001252552 | 0.00273459287178072  | 0.0800759446173637  | 0.148143367879294   | 0.207424198517441  |
| 13 rs8147869 | 32216343  | 0.0295263994084431  | 0.0799947911827154 | 0.00124774432273342  | 0.0908058446368309  | 0.0258666663017211  | 0.189843940455048  |
| 13 rs3375370 | 32579634  | 0.0313265468294337  | 0.120882801125899  | 0.00376844533399659  | 0.148104749005783   | 0.055700585347279   | 0.0628566749372273 |
| 13 rs3276294 | 8040312   | 0.0313784008722854  | 0.0631117094755706 | 0.00137402013667754  | 0.221695030149799   | 0.110759606479921   | 0.418524070557324  |
| 13 rs3244809 | 192508154 | 0.0339343359610853  | 0.116135661454502  | 0.00670341076940153  | 0.173958067318217   | 0.124540161028405   | 0.360392250320878  |
| 13 rs3303022 | 131632781 | 0.0339529609991467  | 0.0424172907695233 | 0.00195952352429172  | 0.101621153727965   | 0.138853661347673   | 0.265805413850186  |
| 13 rs3220111 | 199291797 | 0.0343126549884863  | 0.051426549746508  | 0.00704330275292788  | 0.0700538337192394  | 0.105762461806802   | 0.0813408192830586 |
| 13 rs3461621 | 60423087  | 0.0405355850341412  | 0.120591656797152  | 0.0107889692177248   | 0.110022038699009   | 0.295431792841355   | 0.332652123813657  |
| 13 rs3412680 | 31640209  | 0.0418660593323715  | 0.0621698724335227 | 0.0106759422872593   | 0.101820629849354   | 0.0816388587031291  | 0.196314115761568  |
| 13 rs3366212 | 3626929   | 0.0423439049166626  | 0.0305292216582322 | 0.0051972576494507   | 0.100547004233657   | 0.158159406943658   | 0.241950145925271  |
| 13 rs8121361 | 21237277  | 0.0477627588314052  | 0.0600141854676125 | 0.00994354618566223  | 0.134494611928334   | 0.263855330750764   | 0.352530275537511  |
| 13 rs3209578 | 26130238  | 0.0496052301838711  | 0.123064009319771  | 0.0113799782594731   | 0.380798124105741   | 0.158676380774518   | 0.238853808144575  |
| 13 rs3377834 | 36909993  | 0.0501951961305051  | 0.364985919700094  | 0.00976060772523263  | 0.19261216419145    | 0.0707595221855237  | 0.317887858228313  |
| 13 rs3451173 | 108079632 | 0.0541552043817406  | 0.296966450693976  | 0.00476402038434566  | 0.309453372681937   | 0.523684315757902   | 0.569194814067941  |
| 13 rs8121666 | 91528973  | 0.0550960476076538  | 0.230027361440741  | 0.00154640201383486  | 0.462301434449888   | 0.232543610131102   | 0.368609311901224  |
| 13 rs3463585 | 26047648  | 0.0570415406964746  | 0.131443814044769  | 0.00701819325239083  | 0.125842988967702   | 0.185860263380066   | 0.348745133599718  |
| 13 rs3423508 | 96978107  | 0.0577097640022059  | 0.056769048052723  | 0.0042260695985461   | 0.2388839630642     | 0.387242776666952   | 0.543340734553636  |
| 13 rs3407175 | 12131329  | 0.0600019916163142  | 0.644321478092218  | 0.00773211967019874  | 0.0634494303445717  | 0.329871160016322   | 0.0340796992615578 |
| 13 rs3450422 | 206231976 | 0.0600111138997565  | 0.0678399041163552 | 0.0109380459177759   | 0.0625908146946894  | 0.0625904590601389  | 0.0176429731099197 |

|    |            |           |                      |                     |                      |                    |                    |                    |
|----|------------|-----------|----------------------|---------------------|----------------------|--------------------|--------------------|--------------------|
| 13 | rs3406563' | 26046609  | 0.0657057413977185   | 0.212171540762785   | 0.00620682400106229  | 0.328357233944682  | 0.140893850686664  | 0.297412085533483  |
| 13 | rs3325869' | 217504973 | 0.0680180759631521   | 0.0764859354304192  | 0.00574345640712734  | 0.173342541464736  | 0.230625366376832  | 0.236666395435851  |
| 13 | rs3269032. | 203101175 | 0.0684651254507353   | 0.0369127711554234  | 0.00732271281701228  | 0.063070454509679  | 0.0487986764187748 | 0.0860632722896531 |
| 13 | rs3195677' | 212930351 | 0.07114331130592373  | 0.0425785278327702  | 0.00967316540695786  | 0.133433858403078  | 0.22139747923303   | 0.285092725444293  |
| 13 | rs3458974  | 20309785  | 0.0861690516782402   | 0.0521177140271778  | 0.011588181545764    | 0.125566062008831  | 0.0382865169381826 | 0.119570066511916  |
| 13 | rs8085979' | 35934708  | 0.110288691076882    | 0.135856443577608   | 0.00942528616186583  | 0.210243638558321  | 0.0175836715251499 | 0.540292693533706  |
| 13 | rs3186945  | 210484468 | 0.142890184722774    | 0.0986617220003299  | 0.00748464092535553  | 0.455827236621427  | 0.526327201041246  | 0.647913671562992  |
| 13 | rs3291212' | 210484774 | 0.142890184722774    | 0.0986617220003299  | 0.00748464092535553  | 0.455827236621427  | 0.526327201041246  | 0.647913671562992  |
| 13 | rs3242923. | 199361600 | 0.144655494175811    | 0.0512129403687314  | 0.00826729441994129  | 0.169388723552382  | 0.0532161029772002 | 0.284747900411245  |
| 13 | rs3412445. | 199306436 | 0.144655494175811    | 0.0512129403687314  | 0.00826729441994129  | 0.169388723552382  | 0.0532161029772002 | 0.284747900411245  |
| 13 | rs3272612' | 206120076 | 0.144655494175813    | 0.0512129403687308  | 0.00826729441994148  | 0.169388723552384  | 0.0532161029771997 | 0.284747900411247  |
| 13 | rs5561914' | 207340084 | 0.145278990764225    | 0.143032729204445   | 0.00759098203532224  | 0.1242765371609778 | 0.0257712253016214 | 0.149422109759406  |
| 13 | rs3274174. | 73608501  | 0.183969093967197    | 0.138416788493396   | 0.0114539163847162   | 0.288111936826201  | 0.440697999515146  | 0.393593376896755  |
| 13 | rs3346266' | 199291655 | 0.376776079083791    | 0.36412747887279    | 0.00229666294822575  | 0.388330048682073  | 0.0353379990889853 | 0.332931996805906  |
| 13 | rs3421895. | 28863621  | 0.720496761339334    | 0.653976865607155   | 0.0107697445655903   | 0.395296551122661  | 0.306102995848487  | 0.0643157350936314 |
| 14 | rs3218264- | 49434505  | 0.000742942459994207 | 0.0871693744123082  | 0.000628388367751545 | 0.116670569142834  | 0.0641226131019795 | 0.167271672002719  |
| 14 | rs3438132' | 6823063   | 0.000887991925764021 | 0.0355231880268987  | 0.00409604513788395  | 0.0919746593091762 | 0.206961585264044  | 0.455131730606471  |
| 14 | rs3288774' | 65323473  | 0.00163625903449378  | 0.0582998402378043  | 0.000895042706398031 | 0.307219899162801  | 0.288727842144033  | 0.359335832353911  |
| 14 | rs8081021. | 64065519  | 0.00169545231355578  | 0.045745410207621   | 0.000634671296413431 | 0.0982488039206009 | 0.11882815102207   | 0.251183405519712  |
| 14 | rs3260562  | 143697147 | 0.00475045275899215  | 0.0885854231458667  | 0.0113358789380636   | 0.439014410722081  | 0.551276744659792  | 0.639535823966946  |
| 14 | rs8089627' | 120072061 | 0.00572895959588916  | 0.0560581786207445  | 0.000499633441139312 | 0.245809668551144  | 0.19666033302536   | 0.443736192859079  |
| 14 | rs3188714. | 124190799 | 0.0063486322778502   | 0.0132063602439814  | 0.00348874837587329  | 0.265777770395719  | 0.114826807088807  | 0.27704900342722   |
| 14 | rs3329610' | 33829075  | 0.00726369716801976  | 0.0533117240319091  | 0.000316020169650435 | 0.135115261816779  | 0.104570561208607  | 0.268966200316102  |
| 14 | rs3425110  | 78291644  | 0.00764253672485518  | 0.17957262868775    | 0.000868167612314121 | 0.0445178449668642 | 0.0237050866627917 | 0.0472731705745316 |
| 14 | rs3216015- | 33703897  | 0.00815637230239739  | 0.206088125769011   | 0.00194197747840692  | 0.263582316782933  | 0.237150329642302  | 0.191039751974867  |
| 14 | rs3230488- | 41287689  | 0.0121787749359123   | 0.0300530591448541  | 0.000920439629268903 | 0.158956833616379  | 0.141803444264383  | 0.2344221207291    |
| 14 | rs3303860. | 53394297  | 0.0122998694550656   | 0.319026194362888   | 0.0109148950087957   | 0.459433349368788  | 0.418786362974139  | 0.324957531035751  |
| 14 | rs3276304' | 118624361 | 0.0126774920484823   | 0.0682106148218433  | 0.00117202964093897  | 0.0128116098536887 | 0.0280186171343635 | 0.0432443982320957 |
| 14 | rs3245875- | 99354470  | 0.0139686660007038   | 0.154075746765721   | 0.0104678955220412   | 0.147652374609822  | 0.0702952249741271 | 0.281726641026217  |
| 14 | rs3439327- | 92530709  | 0.0139686660007038   | 0.154075746765722   | 0.0104678955220412   | 0.147652374609823  | 0.0702952249741266 | 0.281726641026216  |
| 14 | rs6987637. | 122330777 | 0.0145527947566053   | 0.0288640214229266  | 0.00371756596064713  | 0.214624692905241  | 0.199436982553887  | 0.349642004289109  |
| 14 | rs3294188- | 27802425  | 0.0147529758889048   | 0.0754089926608732  | 0.00104849606955726  | 0.158864433111975  | 0.1424810979772    | 0.304878966405801  |
| 14 | rs3364679' | 50866845  | 0.016474491798131    | 0.0710603425156858  | 0.00344879454605868  | 0.124910716768252  | 0.0680441381901031 | 0.186662983261136  |
| 14 | rs3217080. | 116531687 | 0.0168843618815278   | 0.0960526749459507  | 0.0108877881393199   | 0.160837011218336  | 0.109602260785092  | 0.133691764790076  |
| 14 | rs3291563- | 140604230 | 0.0182415018496304   | 0.182854577314135   | 0.000778787749655973 | 0.230765025792444  | 0.311667841695452  | 0.439422513582524  |
| 14 | rs8145066. | 41110559  | 0.0186286624674901   | 0.0694225207876703  | 0.00468586622567569  | 0.21910925504409   | 0.301697780600473  | 0.490663290276386  |
| 14 | rs6915781' | 68154165  | 0.0216432067402465   | 0.12186772240119    | 0.0109726551519421   | 0.189504402819799  | 0.0990763043987766 | 0.336377093670752  |
| 14 | rs7902023- | 52274805  | 0.0234073476589882   | 0.210599061443395   | 0.0114838435421427   | 0.0133768875083331 | 0.042507229235867  | 0.032851371942944  |
| 14 | rs8080907' | 120071962 | 0.0239339665946083   | 0.06913030444166821 | 0.0056045826926454   | 0.178615358021515  | 0.0796788252913504 | 0.0666663513895059 |
| 14 | rs3406143' | 140571709 | 0.0273339546295444   | 0.0619756618525178  | 0.000468444875920213 | 0.206592568138646  | 0.19904646064084   | 0.359440184999533  |
| 14 | rs3283940- | 12846088  | 0.0274343786332352   | 0.14350785049485    | 0.00362235484577054  | 0.29300231691867   | 0.251267128706693  | 0.454554370751718  |
| 14 | rs1969545. | 45896335  | 0.0281369354327813   | 0.0334822001252552  | 0.00273459287178072  | 0.0800759446173635 | 0.148143367879294  | 0.207424198517442  |
| 14 | rs6970597- | 150607244 | 0.0281369354327813   | 0.0334822001252552  | 0.00273459287178072  | 0.0800759446173635 | 0.148143367879294  | 0.207424198517442  |
| 14 | rs3199421' | 33279638  | 0.0281369354327813   | 0.0334822001252552  | 0.00273459287178072  | 0.0800759446173637 | 0.148143367879294  | 0.207424198517441  |
| 14 | rs3289949- | 33830714  | 0.0281369354327813   | 0.0334822001252552  | 0.00273459287178072  | 0.0800759446173637 | 0.148143367879294  | 0.207424198517441  |
| 14 | rs3340819- | 32599436  | 0.0281369354327813   | 0.0334822001252552  | 0.00273459287178072  | 0.0800759446173637 | 0.148143367879294  | 0.207424198517441  |

|              |           |                     |                     |                      |                     |                     |                    |
|--------------|-----------|---------------------|---------------------|----------------------|---------------------|---------------------|--------------------|
| 14 rs3361623 | 32712936  | 0.0281369354327813  | 0.0334822001252552  | 0.00273459287178072  | 0.0800759446173637  | 0.148143367879294   | 0.207424198517441  |
| 14 rs3369216 | 32712449  | 0.0281369354327813  | 0.0334822001252552  | 0.00273459287178072  | 0.0800759446173637  | 0.148143367879294   | 0.207424198517441  |
| 14 rs3410384 | 33733150  | 0.0281369354327813  | 0.0334822001252552  | 0.00273459287178072  | 0.0800759446173637  | 0.148143367879294   | 0.207424198517441  |
| 14 rs7929599 | 33229125  | 0.0281369354327813  | 0.0334822001252552  | 0.00273459287178072  | 0.0800759446173637  | 0.148143367879294   | 0.207424198517441  |
| 14 rs3348102 | 12845906  | 0.0287208580412675  | 0.235979234951103   | 0.00329348477417747  | 0.432426919589463   | 0.253815870748089   | 0.342475942931107  |
| 14 rs3462899 | 12845957  | 0.0287208580412675  | 0.235979234951103   | 0.00329348477417747  | 0.432426919589463   | 0.253815870748089   | 0.342475942931107  |
| 14 rs3420252 | 88501898  | 0.0320903980581091  | 0.0723526178610075  | 0.00645480974449373  | 0.136345669654891   | 0.247593844972407   | 0.457722497059509  |
| 14 rs8087521 | 118346487 | 0.032103773118404   | 0.00297755357672347 | 0.00493502124311874  | 0.0720054540559973  | 0.107186351552106   | 0.0906370270531052 |
| 14 rs3423405 | 36414743  | 0.0325681726215985  | 0.324074111970199   | 0.00401317868352992  | 0.383143460227735   | 0.426380778618272   | 0.629281520203005  |
| 14 rs3278261 | 64775214  | 0.0326180406184516  | 0.157514967738924   | 0.00216605217249105  | 0.365444425598378   | 0.172292885179582   | 0.288825545298245  |
| 14 rs3400261 | 84024156  | 0.0348835570032713  | 0.166470243923997   | 0.000538303004353968 | 0.948584862633815   | 0.726660130048775   | 0.974447901859865  |
| 14 rs3456358 | 11510384  | 0.0368258089085569  | 0.0335529197711763  | 0.00784015664020747  | 0.160281393917462   | 0.0353991619723792  | 0.254623348494965  |
| 14 rs3294336 | 77503458  | 0.0376717481163328  | 0.113716525440782   | 0.00435871816017188  | 0.272362376208511   | 0.216902920741475   | 0.490160199286997  |
| 14 rs3244566 | 36436405  | 0.0384760925932951  | 0.0220822635747315  | 0.00477917461353888  | 0.0807544899571381  | 0.132401976508004   | 0.215287949203692  |
| 14 rs3260275 | 32711746  | 0.0384760925932951  | 0.0220822635747315  | 0.00477917461353888  | 0.0807544899571381  | 0.132401976508004   | 0.215287949203692  |
| 14 rs3276138 | 32739036  | 0.0384760925932951  | 0.0220822635747315  | 0.00477917461353888  | 0.0807544899571381  | 0.132401976508004   | 0.215287949203692  |
| 14 rs3412390 | 31150321  | 0.0384760925932951  | 0.0220822635747315  | 0.00477917461353888  | 0.0807544899571381  | 0.132401976508004   | 0.215287949203692  |
| 14 rs3436430 | 33158738  | 0.0384760925932951  | 0.0220822635747315  | 0.00477917461353888  | 0.0807544899571381  | 0.132401976508004   | 0.215287949203692  |
| 14 rs3284340 | 81253412  | 0.0385593539751064  | 0.297845667077894   | 0.00488749297842794  | 0.0260688700488816  | 0.205508898252446   | 0.135402877262974  |
| 14 rs3204234 | 98575861  | 0.0395902815454012  | 0.0594787587108732  | 0.00114890876414794  | 0.128318114313658   | 0.0387647619740167  | 0.0880494812095132 |
| 14 rs3349998 | 34177558  | 0.0423439049166626  | 0.0305292216582322  | 0.0051972576494507   | 0.100547004233657   | 0.158159406943658   | 0.241950145925271  |
| 14 rs3461884 | 113508261 | 0.0423439049166626  | 0.0305292216582322  | 0.0051972576494507   | 0.100547004233657   | 0.158159406943658   | 0.241950145925271  |
| 14 rs8091352 | 144178016 | 0.0423439049166626  | 0.0305292216582322  | 0.0051972576494507   | 0.100547004233657   | 0.158159406943658   | 0.241950145925271  |
| 14 rs3330297 | 143120560 | 0.0427037049778332  | 0.0505269156416695  | 0.00337096283887062  | 0.103759357028454   | 0.139433744652291   | 0.288760765756151  |
| 14 rs3183683 | 140571634 | 0.0443317661331489  | 0.109190280902451   | 0.000609248577343864 | 0.00966838195190979 | 0.0688859106220393  | 0.131692769187193  |
| 14 rs8084061 | 143109491 | 0.0445336355262127  | 0.00893783462563298 | 0.0104102257046336   | 0.00600397320633227 | 0.00660465262613099 | 0.0346049447811447 |
| 14 rs8097134 | 135752181 | 0.0482990227219953  | 0.0320523904879801  | 0.00767692624460276  | 0.0291915749333493  | 0.0321212624019256  | 0.0502100978728863 |
| 14 rs3284199 | 98578470  | 0.0516075282116875  | 0.0634430955912895  | 0.00611659037811679  | 0.133687781240064   | 0.0389800499779409  | 0.062389017293962  |
| 14 rs3405878 | 145503117 | 0.0628669110452344  | 0.189388322598304   | 0.00500618038617328  | 0.20288652858415    | 0.0501355125306912  | 0.24280184071525   |
| 14 rs3257750 | 145502695 | 0.0628924610342696  | 0.0377772795240923  | 0.00997378091691978  | 0.132000238682807   | 0.1974452842305     | 0.288562330520408  |
| 14 rs3403333 | 78520462  | 0.0637187374282877  | 0.0356879875462786  | 0.00101411267288314  | 0.102644710666777   | 0.182673863503118   | 0.559074592743944  |
| 14 rs3236198 | 120352109 | 0.0748739208182478  | 0.0512641960468292  | 0.0090850904509611   | 0.0486988754145662  | 0.302489734651586   | 0.463899189958638  |
| 14 rs3238920 | 65306790  | 0.086256448939375   | 0.229589303901783   | 0.00453320643585834  | 0.110957105613925   | 0.094856659483786   | 0.119510092651868  |
| 14 rs3272195 | 41128934  | 0.0873587354513145  | 0.289537033044749   | 0.00995106493515815  | 0.872286713102274   | 0.324628468556326   | 0.861139286547617  |
| 14 rs3305591 | 32817797  | 0.109160227588731   | 0.30317315061714    | 0.00521334629581154  | 0.429284665409671   | 0.0868216901183489  | 0.374659374659829  |
| 14 rs3330681 | 97822263  | 0.111681945657973   | 0.13973952095204    | 0.00394782907598238  | 0.4519519219787     | 0.396250377090039   | 0.521317969183662  |
| 14 rs3207716 | 141053655 | 0.111681945657973   | 0.13973952095204    | 0.00394782907598238  | 0.451951921978701   | 0.396250377090039   | 0.521317969183662  |
| 14 rs3303340 | 21928756  | 0.116617023869974   | 0.232295050953034   | 0.000911585011770241 | 0.327191241396368   | 0.168487229212838   | 0.184638405502339  |
| 14 rs3215234 | 6955456   | 0.134113612077824   | 0.170745511951432   | 0.0105722055958877   | 0.532106415761617   | 0.29771556086445    | 0.378441348617436  |
| 14 rs3243733 | 58498506  | 0.471853340470488   | 0.178533566931876   | 0.000973363666425727 | 0.606385264505482   | 0.00827771191355381 | 0.900610826695934  |
| 14 rs3341328 | 78283546  | 0.720496761339334   | 0.653976865607155   | 0.01076974456559     | 0.39529655112266    | 0.306102995848487   | 0.0643157350936312 |
| 15 rs3222728 | 147313589 | 0.00207368479333776 | 0.0122338518728086  | 0.00156445174978072  | 0.367980032803344   | 0.361966233161177   | 0.434475401853544  |
| 15 rs3346957 | 85027196  | 0.00600386630229397 | 0.0129368778035915  | 0.00273163570659132  | 0.150676004425826   | 0.131766338330679   | 0.136074901012837  |
| 15 rs3382211 | 92427236  | 0.0089034231490415  | 0.245771081240869   | 0.00258963191298307  | 0.0977065743969209  | 0.0608075730753756  | 0.193979040512661  |
| 15 rs3374707 | 117591252 | 0.0139686660007038  | 0.154075746765721   | 0.0104678955220412   | 0.147652374609822   | 0.0702952249741271  | 0.281726641026217  |
| 15 rs3262132 | 59486901  | 0.014460374156821   | 0.0762644666824232  | 0.00103278118332941  | 0.0973174845372415  | 0.0391403348051445  | 0.141890677242108  |



|              |           |                    |                     |                      |                    |                      |                    |
|--------------|-----------|--------------------|---------------------|----------------------|--------------------|----------------------|--------------------|
| 15 rs3203639 | 133367799 | 0.0168843618815278 | 0.0960526749459507  | 0.0108877881393199   | 0.160837011218336  | 0.109602260785092    | 0.133691764790076  |
| 15 rs3316956 | 133367825 | 0.0168843618815278 | 0.0960526749459507  | 0.0108877881393199   | 0.160837011218336  | 0.109602260785092    | 0.133691764790076  |
| 15 rs3227815 | 153950251 | 0.0223620767613721 | 0.173441290625713   | 0.00166399649716032  | 0.436901387805591  | 0.308026101917547    | 0.640362008621839  |
| 15 rs3279596 | 150857956 | 0.0235446470945567 | 0.0287404758798914  | 0.000540984266270978 | 0.356153148478526  | 0.531498917636717    | 0.713093087970178  |
| 15 rs3378378 | 150857845 | 0.023544647094557  | 0.0287404758798913  | 0.000540984266270709 | 0.356153148478527  | 0.531498917636717    | 0.713093087970178  |
| 15 rs3456090 | 34660079  | 0.0251256269545563 | 0.0594337895875268  | 0.00555366741965993  | 0.0441775400349829 | 0.0183074070400647   | 0.206723770338945  |
| 15 rs3345305 | 88506046  | 0.0260095355839013 | 0.309524662203799   | 0.00269416811464929  | 0.283413799182943  | 0.391187631404995    | 0.521032974511898  |
| 15 rs3358740 | 8578207   | 0.032618040618452  | 0.157514967738922   | 0.00216605217249105  | 0.365444425598378  | 0.172292885179581    | 0.288825545298244  |
| 15 rs3355054 | 62266283  | 0.0362560707708525 | 0.0282610602828655  | 0.00816425167713466  | 0.178463612866269  | 0.322337540653441    | 0.369184698004752  |
| 15 rs3273259 | 150857719 | 0.0370754890371047 | 0.0065949106537771  | 0.00708290339700994  | 0.358131555743209  | 0.265843635272708    | 0.690412077160898  |
| 15 rs3341047 | 34655413  | 0.0405442362988152 | 0.0889243702514323  | 0.00445307156445923  | 0.188276658029139  | 0.282985862208194    | 0.455429261666618  |
| 15 rs3443350 | 34655511  | 0.0405442362988152 | 0.0889243702514323  | 0.00445307156445923  | 0.188276658029139  | 0.282985862208194    | 0.455429261666618  |
| 15 rs8145366 | 1931345   | 0.041261818303451  | 0.0129489619508119  | 0.00694205838494492  | 0.108534764846567  | 0.171875811065724    | 0.278820200770991  |
| 15 rs3250777 | 156939264 | 0.0423439049166624 | 0.0305292216582321  | 0.00519725764945061  | 0.100547004233656  | 0.158159406943658    | 0.241950145925271  |
| 15 rs3309509 | 55742776  | 0.0423439049166626 | 0.0305292216582322  | 0.0051972576494507   | 0.100547004233657  | 0.158159406943658    | 0.241950145925271  |
| 15 rs3301223 | 154436750 | 0.0501951961305052 | 0.364985919700095   | 0.00976060772523265  | 0.19261216419145   | 0.0707595221855238   | 0.317887858228313  |
| 15 rs7010029 | 59811305  | 0.0534481716839419 | 0.0454183090182426  | 0.00856649566678947  | 0.0393935553551672 | 0.0439080215768211   | 0.0567214287547952 |
| 15 rs3306753 | 34951479  | 0.0537664379418645 | 0.00727261573911662 | 0.00278148706244348  | 0.0457887463957871 | 0.0379913138395884   | 0.212695653249749  |
| 15 rs3197040 | 87454963  | 0.0584205875485017 | 0.412843096504393   | 0.00880408719888988  | 0.396282496777123  | 0.512662781020422    | 0.655831414256238  |
| 15 rs3235359 | 156947563 | 0.0627493786453103 | 0.1079101612937097  | 0.00941841440337097  | 0.135264572483218  | 0.140906247042127    | 0.317452630694478  |
| 15 rs3299338 | 55551181  | 0.0771938058751988 | 0.237512721853702   | 0.00601559903347051  | 0.284402197821095  | 0.290918515997563    | 0.641590066119837  |
| 15 rs3381792 | 62269890  | 0.0785213558143473 | 0.0579412657042112  | 0.0106625309826886   | 0.162670897316063  | 0.256735177556632    | 0.316891008464154  |
| 15 rs3382770 | 134435750 | 0.0785213558143473 | 0.0579412657042112  | 0.0106625309826886   | 0.162670897316063  | 0.256735177556632    | 0.316891008464154  |
| 15 rs3214111 | 134279537 | 0.0801126765481016 | 0.107632224346474   | 0.00543937499417737  | 0.192912840285415  | 0.071540923811617    | 0.14403865705608   |
| 15 rs8092787 | 152266762 | 0.0804439865810184 | 0.0755388460969892  | 0.00488260111090777  | 0.16099726709238   | 0.155647912358889    | 0.179628808295479  |
| 15 rs3334480 | 29056823  | 0.0842863189679623 | 0.0640888035518868  | 0.0031138940489227   | 0.287908583786379  | 0.220969944172733    | 0.355598438800233  |
| 15 rs3373650 | 91393259  | 0.109659689207876  | 0.0684962882152247  | 0.0112299993096966   | 0.0308136125344204 | 0.0772961455226757   | 0.0906487311244957 |
| 15 rs3256904 | 26822438  | 0.110288691076882  | 0.135856443577608   | 0.00942528616186582  | 0.210243638558321  | 0.0175836715251499   | 0.540292693533708  |
| 16 rs3183332 | 81583302  | 0.007131449903345  | 0.127635963155837   | 0.00798558782004365  | 0.157049247015699  | 0.0998472212358099   | 0.0387815918870622 |
| 16 rs3247374 | 51705860  | 0.0134417876127264 | 0.582397316810987   | 0.00515753262087335  | 0.258086931777987  | 0.105520497080482    | 0.429004974674132  |
| 16 rs3317583 | 68557359  | 0.0186882468638167 | 0.0460029460646416  | 0.00620980752366929  | 0.0450962477254488 | 0.0794565150783544   | 0.025418331456789  |
| 16 rs3361784 | 78053316  | 0.0233181849292502 | 0.0742377757875972  | 0.00145728806353879  | 0.0753765217628244 | 0.130231266107381    | 0.257782419928273  |
| 16 rs3240413 | 77975877  | 0.0321322911226503 | 0.12210762464253    | 0.0102351529917759   | 0.0754803050680386 | 0.125540975273747    | 0.269470253846817  |
| 16 rs3278275 | 36553272  | 0.0324306397291394 | 0.0847716150723628  | 0.00857002993012651  | 0.110670211563234  | 0.122209329208948    | 0.323232256148168  |
| 16 rs7010524 | 78196160  | 0.0340021553718574 | 0.0319000552577648  | 0.00429127337274457  | 0.0615258595704286 | 0.117385354494912    | 0.243850104171981  |
| 16 rs3208814 | 82445863  | 0.0347949627418334 | 0.131576428312407   | 0.0119136709466106   | 0.271751047957633  | 0.488690106073352    | 0.490503629439932  |
| 16 rs3424767 | 44284232  | 0.0423439049166626 | 0.0305292216582322  | 0.0051972576494507   | 0.100547004233657  | 0.158159406943658    | 0.241950145925271  |
| 16 rs3335638 | 4222669   | 0.0581129627381979 | 0.201530252106604   | 0.00562530426377138  | 0.373156050384555  | 0.223227669003948    | 0.280781800928044  |
| 16 rs3271901 | 58081919  | 0.0588854930779914 | 0.203843711469919   | 0.00442300964084003  | 0.407068962277831  | 0.217457907149703    | 0.332381790591334  |
| 16 rs3220273 | 20792895  | 0.0832632694143644 | 0.0271495205972757  | 0.0021860943906238   | 0.167482117786212  | 0.114987938849886    | 0.434657311898818  |
| 16 rs3366773 | 46609601  | 0.117351187577509  | 0.0573872141126819  | 0.0116907111489937   | 0.138348654644084  | 0.000812900851629944 | 0.127552340825657  |
| 16 rs3312615 | 74250026  | 0.126154481177872  | 0.262049835615445   | 0.00835614281559738  | 0.350140732273378  | 0.161644000602218    | 0.363281758350178  |
| 16 rs3304363 | 78052369  | 0.12688447498836   | 0.121290439828212   | 0.00368474252736588  | 0.251378440528001  | 0.0599572266300806   | 0.422454880414405  |
| 16 rs3415126 | 78052420  | 0.16578721590922   | 0.189544258581168   | 0.0039487555415148   | 0.615504248435452  | 0.377498497468587    | 0.41534583809434   |
| 16 rs6974379 | 81669092  | 0.720496761339334  | 0.653976865607155   | 0.0107697445655903   | 0.395296551122661  | 0.306102995848487    | 0.0643157350936314 |
| 16 rs3335427 | 24931343  | 0.720496761339334  | 0.653976865607156   | 0.0107697445655934   | 0.395296551122662  | 0.306102995848487    | 0.0643157350936305 |

|               |          |                      |                     |                      |                    |                     |                    |
|---------------|----------|----------------------|---------------------|----------------------|--------------------|---------------------|--------------------|
| 16 rs3342625: | 80366642 | 2.8042816017563e-05  | 0.454812669533891   | 0.00760461580697955  | 0.0827780981790688 | 0.0593864191773424  | 0.168329653606403  |
| 17 rs3212516: | 64062748 | 0.000278587310515823 | 0.0684593264535083  | 0.000504507871045886 | 0.200909394000381  | 0.212554647346323   | 0.325474651499858  |
| 17 rs3415163: | 66131137 | 0.00397319232534075  | 0.282103084614935   | 0.00893342421572834  | 0.452112550859205  | 0.611786989741745   | 0.706881550413126  |
| 17 rs8121119: | 43733590 | 0.00420352638569506  | 0.375834342049776   | 0.0307579954641491   | 0.0657024920971061 | 0.00333636870474715 | 0.270770701403242  |
| 17 rs3349904  | 12814784 | 0.00569525559640175  | 0.201238576369941   | 0.011308185883491    | 0.230813559359394  | 0.388806398942012   | 0.487854528799739  |
| 17 rs3373710. | 53452738 | 0.00726369716801976  | 0.0533117240319091  | 0.000316020169650435 | 0.135115261816779  | 0.104570561208607   | 0.268966200316102  |
| 17 rs3427347: | 43511147 | 0.00900817676074971  | 0.215527310303848   | 0.0113503377253333   | 0.191655146996718  | 0.0921008401389852  | 0.108837474871834  |
| 17 rs3405944. | 53453560 | 0.0093532230745937   | 0.136129762522744   | 0.00567153823162924  | 0.330313856536424  | 0.242904846274215   | 0.218051678538774  |
| 17 rs8099074: | 64089303 | 0.0123690513707778   | 0.0454347723867294  | 0.00986875514502993  | 0.30408358341069   | 0.0592205829132902  | 0.140336549751768  |
| 17 rs3351185: | 36230454 | 0.0139686660007038   | 0.154075746765721   | 0.0104678955220412   | 0.147652374609822  | 0.0702952249741269  | 0.281726641026217  |
| 17 rs3429858: | 53453320 | 0.0139686660007038   | 0.154075746765721   | 0.0104678955220412   | 0.147652374609822  | 0.0702952249741271  | 0.281726641026217  |
| 17 rs3249013: | 53452983 | 0.0139686660007038   | 0.154075746765722   | 0.0104678955220412   | 0.147652374609823  | 0.0702952249741266  | 0.281726641026216  |
| 17 rs3282052  | 40368140 | 0.0159563884126414   | 0.114014565107281   | 0.0111800349168051   | 0.0809360995320093 | 0.0965255142476027  | 0.125479542591604  |
| 17 rs3436981: | 42694444 | 0.0181784200029421   | 0.156398659001672   | 0.00445354367782672  | 0.255870485215709  | 0.16029408936312    | 0.3995459780445    |
| 17 rs3215396: | 53453597 | 0.0182415018496304   | 0.182854577314135   | 0.000778787749655973 | 0.230765025792444  | 0.311667841695452   | 0.439422513582524  |
| 17 rs3222284. | 59951609 | 0.019264559654856    | 0.0774678327838138  | 0.006605387150659371 | 0.0663859486441068 | 0.0121431639033145  | 0.284738222957901  |
| 17 rs3413435: | 36198457 | 0.0195551178450957   | 0.169359293845257   | 0.00161494395241262  | 0.323808964960616  | 0.25991823053633    | 0.361095611038189  |
| 17 rs3278536: | 13101910 | 0.0200627625062261   | 0.0944501755366836  | 0.00812302866954837  | 0.0612156853758992 | 0.0336006548880493  | 0.254086371705151  |
| 17 rs3436563: | 66541484 | 0.0280371513397935   | 0.130507174725558   | 0.00821362671762282  | 0.0652854064274122 | 0.0153527831387947  | 0.194114147571852  |
| 17 rs6943281: | 52813426 | 0.0281369354327813   | 0.0334822001252552  | 0.00273495287178072  | 0.0800759446173637 | 0.148143367879294   | 0.207424198517441  |
| 17 rs3279785: | 59378159 | 0.0298893292794024   | 0.116636853858933   | 0.00352707649704133  | 0.140285388470659  | 0.0641703573290095  | 0.185753155101746  |
| 17 rs3252915: | 6401346  | 0.0305470631950596   | 0.133741599714066   | 0.00105405795739599  | 0.248602568957393  | 0.213936570225772   | 0.40524398661801   |
| 17 rs3404827  | 66541221 | 0.0327312519909901   | 0.190592088620258   | 0.0119914062025006   | 0.0685416035284752 | 0.0307578251861447  | 0.20717894182848   |
| 17 rs1969494. | 52501364 | 0.0330457900746737   | 0.00864019733682116 | 0.00183254728755598  | 0.0371293419766096 | 0.0543986661465393  | 0.163703301404889  |
| 17 rs3319048: | 52465663 | 0.0357969373531825   | 0.0612641686964653  | 0.00349752000829767  | 0.0619688464999446 | 0.0784966653296938  | 0.226104926372477  |
| 17 rs3385386. | 52465695 | 0.0357969373531825   | 0.0612641686964653  | 0.00349752000829767  | 0.0619688464999446 | 0.0784966653296938  | 0.226104926372477  |
| 17 rs3330547: | 52814899 | 0.0384760925932951   | 0.0220822635747315  | 0.00477917461353888  | 0.0807544899571381 | 0.132401976508004   | 0.215287949203692  |
| 17 rs3385767. | 52813990 | 0.0384760925932951   | 0.0220822635747315  | 0.00477917461353888  | 0.0807544899571381 | 0.132401976508004   | 0.215287949203692  |
| 17 rs3398395  | 53228798 | 0.0384760925932951   | 0.0220822635747315  | 0.00477917461353888  | 0.0807544899571381 | 0.132401976508004   | 0.215287949203692  |
| 17 rs3409602: | 52814367 | 0.0384760925932951   | 0.0220822635747315  | 0.00477917461353888  | 0.0807544899571381 | 0.132401976508004   | 0.215287949203692  |
| 17 rs8078856  | 52808733 | 0.0384760925932951   | 0.0220822635747315  | 0.00477917461353888  | 0.0807544899571381 | 0.132401976508004   | 0.215287949203692  |
| 17 rs3424700: | 59401169 | 0.0416534069941933   | 0.0115585009907638  | 0.00996243752139382  | 0.106345207571501  | 0.190308189561073   | 0.239554789872991  |
| 17 rs3276935: | 53453351 | 0.0423439049166626   | 0.0305292216582322  | 0.0051972576494507   | 0.100547004233657  | 0.158159406943658   | 0.241950145925271  |
| 17 rs3355565: | 65160083 | 0.0458445550070329   | 0.444300498692909   | 0.00642766918443527  | 0.202546642720582  | 0.165108000897881   | 0.241749135731994  |
| 17 rs3437205: | 40367914 | 0.048644579725352    | 0.163843177541755   | 0.00224746508908245  | 0.461879346197824  | 0.320635715785472   | 0.579450153206223  |
| 17 rs3222488  | 52501225 | 0.0492079542364637   | 0.0201162925460716  | 0.00827785932698745  | 0.0427628332670249 | 0.030682973521169   | 0.181910119027774  |
| 17 rs3368590. | 64196175 | 0.0534481716839419   | 0.0454183090182426  | 0.00856649566678947  | 0.0393935553551672 | 0.0439080215768211  | 0.0567214287547952 |
| 17 rs3299084: | 48699916 | 0.0554190087523153   | 0.00471122785327156 | 0.0102176288936877   | 0.187730988567726  | 0.0213141455842895  | 0.223826585736584  |
| 17 rs8085055  | 65777816 | 0.0570106899307711   | 0.0471197341778463  | 0.00988345649789664  | 0.0502823695593361 | 0.104189100976413   | 0.0657650909337919 |
| 17 rs3302151: | 28116546 | 0.0571514112397521   | 0.0497995584978317  | 0.0109951552914751   | 0.147031151352171  | 0.219800019684988   | 0.311663792163025  |
| 17 rs3407101  | 66131575 | 0.061804549016308    | 0.0914637540944496  | 0.00380738204733947  | 0.339894288554183  | 0.224095900781807   | 0.412746514473526  |
| 17 rs3388912: | 44648131 | 0.0729659687045385   | 0.0487597699807703  | 0.0115188115525886   | 0.135088800230153  | 0.226597463290249   | 0.346367691616635  |
| 17 rs3247390. | 45271578 | 0.0782505941854104   | 0.0211270936102411  | 0.0115784817480079   | 0.0654606810740792 | 0.100342890556448   | 0.334080616688354  |
| 17 rs3398363: | 15510187 | 0.097783034091836    | 0.0867514407577637  | 0.0111586182113628   | 0.0748613552651568 | 0.0440479152187451  | 0.0920686782140264 |
| 17 rs3418054: | 46628902 | 0.110288691076882    | 0.135856443577608   | 0.00942528616186583  | 0.210243638558321  | 0.0175836715251499  | 0.540292693533706  |
| 17 rs3198035: | 69088478 | 0.124196799809038    | 0.518687441173007   | 0.0107596382028986   | 0.103261581762069  | 0.278524984680198   | 0.243424619930042  |

|              |                              |                    |                     |                    |                    |                    |
|--------------|------------------------------|--------------------|---------------------|--------------------|--------------------|--------------------|
| 17 rs3221175 | 57850552 0.135007115006717   | 0.270170535578131  | 0.00462524406167176 | 0.194327194684456  | 0.0906127959695235 | 0.325547832197833  |
| 17 rs3275855 | 13101805 0.15250642943524    | 0.0639248002966431 | 0.00818765137139261 | 0.251563118934923  | 0.196380338230153  | 0.570954557853637  |
| 17 rs3370465 | 57850070 0.325093106417137   | 0.34733960600692   | 0.00626080849765352 | 0.0540532622304214 | 0.157931287091294  | 0.944704082549937  |
| 18 rs3370523 | 31747058 0.00832238100538566 | 0.313824550339977  | 0.010656587097006   | 0.110410854435232  | 0.0935357147741872 | 0.252022115990552  |
| 18 rs3278775 | 40220837 0.0113164858065877  | 0.267953776589088  | 0.00764810787992655 | 0.121562143385392  | 0.136823098177041  | 0.0448320379443383 |
| 18 rs3222181 | 27260679 0.0170834396007723  | 0.0877319371620278 | 0.00312220331214368 | 0.117817883133987  | 0.0665762894892225 | 0.177699181188724  |
| 18 rs3416263 | 27260422 0.0170834396007723  | 0.0877319371620278 | 0.00312220331214368 | 0.117817883133987  | 0.0665762894892225 | 0.177699181188724  |
| 18 rs3431268 | 31746137 0.0221290339505971  | 0.0518289687135241 | 0.00204713271359889 | 0.109345342803828  | 0.0974431533488039 | 0.203276645609993  |
| 18 rs3251718 | 8555922 0.0281369354327813   | 0.0334822001252552 | 0.00273459287178072 | 0.0800759446173637 | 0.148143367879294  | 0.207424198517441  |
| 18 rs3219084 | 59921692 0.0341859666511615  | 0.144470903440553  | 0.0101771572711047  | 0.139489612963285  | 0.204122910061221  | 0.270560393683985  |
| 18 rs3349501 | 9675669 0.0416534069941933   | 0.0115585009907638 | 0.00996243752139382 | 0.106345207571501  | 0.190308189561073  | 0.239554789872991  |
| 18 rs3343867 | 9570006 0.0423439049166626   | 0.0305292216582322 | 0.0051972576494507  | 0.100547004233657  | 0.158159406943658  | 0.241950145925271  |
| 18 rs3394199 | 9675344 0.0423439049166626   | 0.0305292216582322 | 0.0051972576494507  | 0.100547004233657  | 0.158159406943658  | 0.241950145925271  |
| 18 rs3381150 | 53448987 0.0534481716839416  | 0.0454183090182426 | 0.00856649566678943 | 0.0393935553551669 | 0.0439080215768209 | 0.056721428754795  |
| 18 rs8121262 | 15608381 0.0739580284982004  | 0.0893179867531159 | 0.0103140439877885  | 0.237196055075597  | 0.115520453227423  | 0.11015402584984   |
| 18 rs3372206 | 60729725 0.08953349771456    | 0.595160842986821  | 0.0109132146968929  | 0.551988697823114  | 0.491027011773063  | 0.538026940570016  |
| 18 rs3400294 | 26638779 0.101592763604473   | 0.335070199273565  | 0.00575328912138008 | 0.590135882968925  | 0.368773262010532  | 0.450396449213221  |

Table S2. Localization of differentially expressed genes in QTL regions associated with percentage of all fiber type.

| Type I muscle fibers |     |         |      | Type IIB muscle fibers |     |         |      | Type IIA muscle fibers |                 |         |      |      |  |
|----------------------|-----|---------|------|------------------------|-----|---------|------|------------------------|-----------------|---------|------|------|--|
| Gene                 | SSC | QTLs ID |      | Gene                   | SSC | QTLs ID |      | Gene                   | SSC             | QTLs ID |      |      |  |
| <i>PRPF39</i>        |     | 4021    |      | <i>CXCL14</i>          |     | 7040    |      | <i>CEP162</i>          |                 | 7015    |      |      |  |
| <i>SAMD4A</i>        |     | 4021    |      | <i>PCDH12</i>          |     | 7040    |      | <i>GJA1</i>            |                 | 7015    |      |      |  |
| <i>TMEM260</i>       | 1   | 4021    |      | <i>PROB1</i>           | 2   | 7040    |      | <i>HSF2</i>            | 1               | 7015    |      |      |  |
| <i>TMEM38B</i>       |     | 2794    |      | <i>RAD50</i>           |     | 7040    |      | <i>SNX14</i>           |                 | 7015    |      |      |  |
| <i>ERP44</i>         |     | 2794    |      | <i>SLC35A4</i>         |     | 7040    |      | <i>RAD50</i>           |                 | 4026    |      |      |  |
| <i>FKTN</i>          |     | 2794    |      | <i>RAD50</i>           |     | 4030    |      | <i>ANGPTL4</i>         |                 | 4025    |      |      |  |
| <i>DEGS1</i>         |     | 7026    |      | <i>FBXO32</i>          |     | 2804    | 2805 | 2806                   | <i>DNAJC24</i>  |         | 4025 |      |  |
| <i>EPHX1</i>         |     | 7026    |      | <i>ST3GAL1</i>         | 4   | 2804    | 2805 | 2806                   | <i>EVI5L</i>    |         | 4025 | 7016 |  |
| <i>PPP1R12B</i>      |     | 7012    | 7026 | <i>PTPN21</i>          |     | 357     |      | <i>FAR1</i>            | 2               | 4025    | 7016 |      |  |
| <i>TNNT2</i>         | 10  | 7012    | 7026 | <i>VASH1</i>           | 7   | 357     |      | <i>KCNN1</i>           |                 | 4025    | 7016 |      |  |
| <i>ZBTB18</i>        |     | 7012    | 7026 | <i>ADD1</i>            |     | 7035    |      | <i>MAP2K7</i>          |                 | 4025    | 7016 |      |  |
| <i>EPHX1</i>         |     | 7012    |      | <i>HTT</i>             | 8   | 7035    |      | <i>NACCI</i>           |                 | 4025    | 7016 |      |  |
| <i>DEGS1</i>         |     | 7012    |      | <i>TADA2B</i>          |     | 7035    |      | <i>ANGPTL4</i>         |                 |         | 7016 |      |  |
| <i>STK24</i>         | 11  | 7027    |      | <i>ZFYVE28</i>         |     | 7035    |      | <i>ISG12(A)</i>        | 7               | 7029    |      |      |  |
| <i>ALDH18A1</i>      |     | 2822    | 2824 | <i>FOXO1</i>           | 11  | 7020    | 7023 | 7042                   | <i>SETD3</i>    |         | 7029 |      |  |
| <i>ANKRD2</i>        |     | 2822    | 2824 | <i>CAMKK1</i>          |     | 7021    | 7036 |                        | <i>DDX58</i>    |         | 7031 |      |  |
| <i>ARV1</i>          |     | 2822    | 2824 | <i>CAMTA2</i>          |     | 7021    | 7036 |                        | <i>DEGS1</i>    |         | 7034 |      |  |
| <i>HIRA</i>          |     | 2822    | 2824 | <i>CHD3</i>            | 12  | 7021    | 7036 |                        | <i>EPHX1</i>    |         | 7034 |      |  |
| <i>LYST</i>          |     | 2822    | 2824 | <i>KIF1C</i>           |     | 7021    | 7036 |                        | <i>ITGA8</i>    |         | 7031 |      |  |
| <i>MTR</i>           |     | 2822    | 2824 | <i>MYH3</i>            |     | 7021    | 7036 |                        | <i>KIAA1462</i> | 10      | 7031 |      |  |
| <i>MYO18B</i>        | 14  | 2822    | 2824 | <i>MYO1C</i>           |     | 7021    | 7036 |                        | <i>PPP1R12B</i> |         | 7034 |      |  |
| <i>PTK2B</i>         |     | 2822    | 2824 | <i>ALDH18A1</i>        |     | 2823    |      | <i>TNNT2</i>           |                 | 7034    |      |      |  |
| <i>NAA25</i>         |     | 2822    | 2824 | <i>ANKRD2</i>          |     | 2823    |      | <i>TOPORS</i>          |                 | 7031    |      |      |  |
| <i>RSRC2</i>         |     | 2822    | 2824 | <i>SCARA5</i>          |     | 2823    |      | <i>UBAP1</i>           |                 | 7031    |      |      |  |
| <i>SCARA5</i>        |     | 2822    | 2824 | <i>PTK2B</i>           |     | 2823    |      | <i>ZBTB18</i>          |                 | 7034    |      |      |  |
| <i>WSB2</i>          |     | 2822    | 2824 | <i>C10orf10</i>        |     | 2823    | 4045 |                        | <i>FOXO1</i>    | 11      | 7030 |      |  |

|                     |      |      |      |                     |         |      |                |         |
|---------------------|------|------|------|---------------------|---------|------|----------------|---------|
| <i>SDS</i>          | 2822 | 2824 |      | <i>C14H10orf116</i> | 2823    | 4045 | <i>ATXN7L3</i> | 7033    |
| <i>IFIT1</i>        | 2822 | 2824 |      | <i>IFIT1</i>        | 2823    | 4045 | <i>THRA</i>    | 12 7033 |
| <i>IFIT2</i>        | 2822 | 2824 |      | <i>IFIT2</i>        | 2823    | 4045 | <i>PAXBPI</i>  | 13 7032 |
| <i>IFIT3</i>        | 2822 | 2824 | 4022 | <i>IFIT3</i>        | 2823    | 4045 |                |         |
| <i>IFIT5</i>        | 2822 | 2824 | 4022 | <i>IFIT5</i>        | 2823    | 4045 |                |         |
| <i>JMJD1C</i>       | 2822 | 2824 | 4022 | <i>P4HA1</i>        | 2823    | 4045 |                |         |
| <i>P4HA1</i>        | 2822 | 2824 | 4022 | <i>SLC16A12</i>     | 2823    | 4045 |                |         |
| <i>RUFY2</i>        | 2822 | 2824 | 4022 | <i>RUFY2</i>        | 14 2823 | 4045 | 7024           |         |
| <i>SLC16A12</i>     | 2822 | 2824 | 4022 | <i>JMJD1C</i>       | 2823    |      | 7024           |         |
| <i>C10orf10</i>     | 2822 | 2824 | 4022 | <i>LYST</i>         | 2823    |      | 7024           |         |
| <i>C14H10orf116</i> | 2822 | 2824 | 4022 | <i>MTR</i>          | 2823    |      | 7024           |         |
| <i>BGN</i>          |      |      | 4023 | <i>SDS</i>          | 2823    |      | 7024           |         |
| <i>CD99L2</i>       | X    |      | 4023 | <i>HIRA</i>         | 2823    |      | 7024           |         |
|                     |      |      |      | <i>ARVI</i>         | 2823    |      | 7024           |         |
|                     |      |      |      | <i>WSB2</i>         | 2823    |      | 7024           |         |
|                     |      |      |      | <i>RSRC2</i>        | 2823    |      | 7024           |         |
|                     |      |      |      | <i>MYO18B</i>       | 2823    |      | 7024           |         |
|                     |      |      |      | <i>NAA25</i>        | 2823    |      | 7024           |         |

Table S3. Localization of differentially expressed genes in QTL regions associated with diameter of all fiber type.

| Type I muscle fibers |     |           | Type IIB muscle fibers |     |        | Type IIA muscle fibers |     |           |
|----------------------|-----|-----------|------------------------|-----|--------|------------------------|-----|-----------|
| Gene                 | SSC | QTL ID    | Gene                   | SSC | QTL ID | Gene                   | SSC | QTL ID    |
| <i>CCDC88C</i>       |     | 2812      | <i>CDO1</i>            |     | 2797   | <i>ERP44</i>           |     | 2795      |
| <i>PTPN21</i>        | 7   | 2812      | <i>CHD1</i>            |     | 2797   | <i>FKTN</i>            | 1   | 2795      |
| <i>VASH1</i>         |     | 2812      | <i>DMXL1</i>           |     | 2797   | <i>TMEM38B</i>         |     | 2795      |
| <i>DMTF1</i>         |     | 2813      | <i>F2RL2</i>           |     | 2797   | <i>CDO1</i>            |     | 2796      |
| <i>FAM185A</i>       | 9   | 2813      | <i>FCHO2</i>           | 2   | 2797   | <i>CHD1</i>            |     | 2796      |
| <i>SGCE</i>          |     | 2813      | <i>LVRN</i>            |     | 2797   | <i>DMXL1</i>           |     | 2796      |
| <i>CAMKK1</i>        |     | 2819 2821 | <i>PAPD4</i>           |     | 2797   | <i>F2RL2</i>           |     | 2796      |
| <i>CAMTA2</i>        |     | 2819 2821 | <i>POLR3G</i>          |     | 2797   | <i>FCHO2</i>           | 2   | 2796      |
| <i>CHD3</i>          |     | 2819 2821 | <i>RIOK2</i>           |     | 2797   | <i>LVRN</i>            |     | 2796      |
| <i>DYNLL2</i>        |     | 2819 2821 | <i>ANGPTL1</i>         |     | 7017   | <i>PAPD4</i>           |     | 2796      |
| <i>FLOT2</i>         | 12  | 2819 2821 | <i>C1orf27</i>         | 9   | 7017   | <i>POLR3G</i>          |     | 2796      |
| <i>KIF1C</i>         |     | 2819 2821 | <i>ZRANB1</i>          |     | 2827   | <i>RIOK2</i>           |     | 2796      |
| <i>MYH3</i>          |     | 2819 2821 | <i>FAM53B</i>          |     | 2827   | <i>BIRC6</i>           |     | 7037      |
| <i>MYO1C</i>         |     | 2819 2821 | <i>HIRA</i>            |     | 7018   | <i>MAT2A</i>           |     | 7037      |
| <i>TMEM100</i>       |     | 2819 2821 | <i>JMJD1C</i>          |     | 7018   | <i>SLC9A2</i>          | 3   | 7037      |
| <i>DPP4</i>          |     | 2832      | <i>MTR</i>             |     | 7018   | <i>THUMPD2</i>         |     | 7037      |
| <i>FKBP7</i>         |     | 2832      | <i>MYO18B</i>          |     | 7018   | <i>TTL</i>             |     | 7037      |
| <i>GPR155</i>        |     | 2832      | <i>NAA25</i>           | 14  | 7018   | <i>ADORA3</i>          |     | 2807 2810 |
| <i>HNRNPA3</i>       |     | 2832      | <i>RSRC2</i>           |     | 7018   | <i>ARHGEF11</i>        |     | 2807 2810 |
| <i>NABP1</i>         | 15  | 2832      | <i>RUFY2</i>           |     | 7018   | <i>DENND4B</i>         |     | 2807 2810 |
| <i>NOSTRIN</i>       |     | 2832      | <i>SDS</i>             |     | 7018   | <i>SLC19A2</i>         | 4   | 2807 2810 |
| <i>PRPF40A</i>       |     | 2832      | <i>WSB2</i>            |     | 7018   | <i>SMG5</i>            |     | 2807 2810 |
| <i>SARAF</i>         |     | 2832      | <i>ARV1</i>            |     | 7018   | <i>ST7L</i>            |     | 2807 2810 |
| <i>SF3B1</i>         |     | 2832      | <i>DPP4</i>            |     | 2833   | <i>PTPN21</i>          |     | 358       |
| <i>PIGA</i>          |     | 7014      | <i>FKBP7</i>           |     | 2833   | <i>VASH1</i>           | 7   | 358       |
| <i>RAB9A</i>         | X   | 7014      | <i>GPR155</i>          |     | 2833   | <i>FAM53B</i>          |     | 2828      |
|                      |     |           | <i>HNRNPA3</i>         |     | 2833   | <i>ZRANB1</i>          |     | 2828      |
|                      |     |           | <i>NABP1</i>           | 15  | 2833   | <i>ARV1</i>            |     | 7038      |
|                      |     |           | <i>NOSTRIN</i>         |     | 2833   | <i>HIRA</i>            |     | 7038      |
|                      |     |           | <i>PRPF40A</i>         |     | 2833   | <i>JMJD1C</i>          |     | 7038      |
|                      |     |           | <i>SARAF</i>           |     | 2833   | <i>LYST</i>            |     | 7038      |
|                      |     |           | <i>SF3B1</i>           |     | 2833   | <i>MTR</i>             | 14  | 7038      |
|                      |     |           | <i>PIGA</i>            | X   | 7019   | <i>MYO18B</i>          |     | 7038      |
|                      |     |           | <i>RAB9A</i>           |     | 7019   | <i>NAA25</i>           |     | 7038      |
|                      |     |           |                        |     |        | <i>RSRC2</i>           |     | 7038      |
|                      |     |           |                        |     |        | <i>RUFY2</i>           |     | 7038      |
|                      |     |           |                        |     |        | <i>SDS</i>             |     | 7038      |
|                      |     |           |                        |     |        | <i>WSB2</i>            |     | 7038      |
